# Supplementary material for: Antibiotic prescribing in neonatal sepsis: an Australian nationwide survey
Source: PubMed Central journal article supplement — BMJ Paediatr Open. 2020 Mar 17;4(1):e000643. doi: 10.1136/bmjpo-2020-000643 (PMC7101048; doi:10.1136/bmjpo-2020-000643), 2020-03-17
Supplement: bmjpo-2020-000643.draft_revisions.pdf [file bmjpo-2020-000643.draft_revisions.pdf]

# BMJ Paediatrics Open

BMJ Paediatrics Open is committed to open peer review. As part of this commitment we make the peer review history of every article we publish publicly available.

When an article is published we post the peer reviewers' comments and the authors' responses online. We also post the versions of the paper that were used during peer review. These are the versions that the peer review comments apply to.

The versions of the paper that follow are the versions that were submitted during the peer review process. They are not the versions of record or the final published versions. They should not be cited or distributed as the published version of this manuscript.

BMJ Paediatrics Open is an open access journal and the full, final, typeset and author-corrected version of record of the manuscript is available on our site with no access controls, subscription charges or pay-per-view fees (<http://bmjpaedsopen.bmj.com>).

If you have any questions on BMJ Paediatrics Open's open peer review process please email [info.bmjpo@bmj.com](mailto:info.bmjpo@bmj.com)

# BMJ Paediatrics Open

## Antibiotic prescribing in neonatal sepsis: a nationwide survey

|                               |                                                                                                                                                                                                                                                                                                                                                                                                                                                                                                                                                                                                                     |
|-------------------------------|---------------------------------------------------------------------------------------------------------------------------------------------------------------------------------------------------------------------------------------------------------------------------------------------------------------------------------------------------------------------------------------------------------------------------------------------------------------------------------------------------------------------------------------------------------------------------------------------------------------------|
| Journal:                      | <i>BMJ Paediatrics Open</i>                                                                                                                                                                                                                                                                                                                                                                                                                                                                                                                                                                                         |
| Manuscript ID                 | bmjpo-2020-000643                                                                                                                                                                                                                                                                                                                                                                                                                                                                                                                                                                                                   |
| Article Type:                 | Original research                                                                                                                                                                                                                                                                                                                                                                                                                                                                                                                                                                                                   |
| Date Submitted by the Author: | 15-Jan-2020                                                                                                                                                                                                                                                                                                                                                                                                                                                                                                                                                                                                         |
| Complete List of Authors:     | McMullan, Brendan; Sydney Children's Hospital Randwick, Immunology and Infectious Diseases<br>Cooper, Celia; Women's and Children's Hospital, Department of Infectious Diseases<br>Spotswood, Naomi; Burnet Institute<br>James, Rodney; National Centre for Antimicrobial Stewardship<br>Jones, Cheryl; The University of Sydney<br>Konecny, Pamela; St George Hospital, Kogarah, Infectious Diseases, Immunology and Sexual Health<br>Blyth, Christopher; University of Western Australia, School of Paediatrics and Child Health<br>Karen, Thursky; Infectious Diseases Service and Peter MacCallum Cancer Centre |
| Keywords:                     | Epidemiology, Infectious Diseases, Neonatology, Therapeutics                                                                                                                                                                                                                                                                                                                                                                                                                                                                                                                                                        |
|                               |                                                                                                                                                                                                                                                                                                                                                                                                                                                                                                                                                                                                                     |

SCHOLARONE™  
Manuscripts

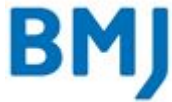

I, the Submitting Author has the right to grant and does grant on behalf of all authors of the Work (as defined in the below author licence), an exclusive licence and/or a non-exclusive licence for contributions from authors who are: i) UK Crown employees; ii) where BMJ has agreed a CC-BY licence shall apply, and/or iii) in accordance with the terms applicable for US Federal Government officers or employees acting as part of their official duties; on a worldwide, perpetual, irrevocable, royalty-free basis to BMJ Publishing Group Ltd ("BMJ") its licensees and where the relevant Journal is co-owned by BMJ to the co-owners of the Journal, to publish the Work in this journal and any other BMJ products and to exploit all rights, as set out in our [licence](#).

The Submitting Author accepts and understands that any supply made under these terms is made by BMJ to the Submitting Author unless you are acting as an employee on behalf of your employer or a postgraduate student of an affiliated institution which is paying any applicable article publishing charge ("APC") for Open Access articles. Where the Submitting Author wishes to make the Work available on an Open Access basis (and intends to pay the relevant APC), the terms of reuse of such Open Access shall be governed by a Creative Commons licence – details of these licences and which [Creative Commons](#) licence will apply to this Work are set out in our licence referred to above.

Other than as permitted in any relevant BMJ Author's Self Archiving Policies, I confirm this Work has not been accepted for publication elsewhere, is not being considered for publication elsewhere and does not duplicate material already published. I confirm all authors consent to publication of this Work and authorise the granting of this licence.

# Antibiotic prescribing in neonatal sepsis: a nationwide survey

**Authors:** Brendan J McMullan<sup>1,2,3</sup>, Celia Cooper<sup>4</sup>, Naomi Spotswood<sup>5,6,7</sup>, Rodney James<sup>8</sup>, Cheryl A Jones<sup>9,10,11</sup>, Pamela Konecny<sup>12,13</sup>, Christopher C Blyth<sup>14,15,16,17</sup>, Karin Thursky<sup>1,6,8,18</sup>, on behalf of the National Antimicrobial Prescribing Survey (NAPS)

**Corresponding Author:** Dr. Brendan J McMullan

Department of Immunology and Infectious Diseases, Sydney Children's Hospital, High St, Randwick, NSW, 2031 Australia

Phone: 61293821508

Fax: 61293821580

Email: brendanoch@yahoo.co.uk

## Author Affiliations:

1. National Centre for Infections in Cancer, University of Melbourne, Melbourne, Australia
2. Department of Immunology and Infectious Diseases, Sydney Children's Hospital, Randwick, Sydney, Australia
3. School of Women's and Children's Health, University of New South Wales, Sydney, Australia
4. Women's and Children's Hospital, Adelaide, Australia
5. Burnet Institute, Melbourne, Australia
6. Department of Medicine, University of Melbourne, Australia
7. Department of Paediatrics, Royal Hobart Hospital, Hobart, Australia.

- 1
  - 2
  - 3
  - 4
  - 5
  - 6
  - 7
  - 8
  - 9
  - 10
  - 11
  - 12
  - 13
  - 14
  - 15
  - 16
  - 17
  - 18
  - 19
  - 20
  - 21
  - 22
  - 23
  - 24
  - 25
  - 26
  - 27
  - 28
  - 29
  - 30
  - 31
  - 32
  - 33
  - 34
  - 35
  - 36
  - 37
  - 38
  - 39
  - 40
  - 41
  - 42
  - 43
  - 44
  - 45
  - 46
  - 47
  - 48
  - 49
  - 50
  - 51
  - 52
  - 53
  - 54
  - 55
  - 56
  - 57
  - 58
  - 59
  - 60
8. National Centre for Antimicrobial Stewardship, The Peter Doherty Institute for Infection and Immunity, Melbourne, Australia
9. Faculty of Medicine and Health, University of Sydney, Sydney, Australia
10. Murdoch Children's Research Institute, Melbourne, Australia
11. Department of Paediatrics, University of Melbourne, Melbourne, Australia
12. Department of Infectious Diseases, Immunology & Sexual Health, St George Hospital, Kogarah, Sydney, Australia
13. St George and Sutherland Clinical School, University of New South Wales, Sydney, Australia
14. School of Medicine, University of Western Australia, Perth, Australia
15. Wesfarmers Centre of Vaccines and Infectious Diseases, Telethon Kids Institute, Perth, Australia
16. Department of Paediatric Infectious Diseases, Perth Children's Hospital, Perth, Australia
17. Department of Microbiology, PathWest Laboratory Medicine, QEII Medical Centre, Perth, Australia
18. Victorian Infectious Diseases Service, The Peter Doherty Institute for Infection and Immunity, Melbourne, Australia

**Keywords: Epidemiology; Infectious Diseases; Neonatology; Therapeutics**

**Word count: 2441 words**

## Abstract

**Objective:** To evaluate quality and variation in antibiotic prescribing for neonatal sepsis.

**Design:** We analysed prescribing in hospitalized neonates, using the National Antimicrobial Prescribing Survey (NAPS) in Australian neonates from 1 January 2014 to 31 December 2018.

**Setting:** Data from antibiotic point prevalence surveys performed in hospitals, ranging from rural hospitals to tertiary paediatric and maternal hospitals within Australia.

**Patients:** Admitted neonates <28 days of age from participating hospitals.

**Main outcome measures:** Variation and appropriateness in prescribing for neonatal sepsis and variation in dosing for gentamicin and benzylpenicillin across hospitals.

**Results:** A total of 415 prescriptions among 214 neonates from 39 different hospitals were included. The majority of prescriptions: 342 (82.4%), were for neonates <7 days of age. The most commonly prescribed antibiotics were gentamicin and benzylpenicillin, with 323 (77.8%) prescriptions. Dosing variability was substantial, with doses ranging from 2mg/kg to 8mg/kg for gentamicin (median 5mg/kg, IQR 4-5mg/kg) and 45-72mg/kg for benzylpenicillin (median 60mg/kg, IQR 48-64). Thirteen (3.2%) and 19 (4.6%) of prescriptions were deemed inappropriate or non-compliant with local or national guidelines, respectively. At time of audit, 47.5% of antibiotics had been given for 2 or more completed days and microbiologically confirmed infection was documented in only 9 neonates (4.2%).

**Conclusions:** Prescribing for neonatal sepsis was dominated by use of benzylpenicillin and gentamicin with substantial variation in dosing. Many prescriptions were given for at least 48 hours despite few confirmed infections. Efforts to standardise antibiotic dosing and duration for suspected neonatal sepsis are recommended.

## Introduction

The neonatal period is the most vulnerable time of life, with neonatal mortality accounting for almost 50% of deaths in children under 5 years and approximately 2.5 million deaths globally in those aged <28 days in 2017.<sup>1</sup> In Australia, despite a comparatively low neonatal mortality rate: 2.3 per 1000 live births compared with 18 per 1000, globally,<sup>2</sup> perinatal infection is identified as the primary cause of neonatal death in 10.6% of Australian neonatal deaths.<sup>3</sup> Risk factors for neonatal sepsis mortality include prematurity, lower postnatal age and immunologic immaturity.<sup>4,5</sup> Neonates who require hospitalisation may have additional risk factors for sepsis, including central venous catheters and mechanical ventilation. Clinical signs of neonatal sepsis are often non-specific,<sup>6</sup> thus empiric antibiotic therapy is commonly prescribed for hospitalized neonates.<sup>7</sup> The majority of neonates treated empirically for sepsis, however, do not have confirmed infection on final assessment.<sup>8,9</sup>

Unintended adverse consequences of widespread antibiotic use for neonates have been increasingly recognised, with calls for better understanding of sepsis epidemiology, and efforts to promote judicious prescribing.<sup>10</sup> The Kaiser Permanente Early Onset Sepsis Calculator is one tool used to predict risk of microbiologically-confirmed infection and reduce unnecessary investigations and antibiotic therapy with some success.<sup>11</sup> This only applies to neonates with early-onset sepsis, however, and similar tools for late-onset sepsis are lacking.

In recognition that epidemiology of sepsis in neonates varies with age, it is commonly divided into early-onset sepsis (EOS) and late-onset sepsis (LOS). While risk and microbiology of sepsis in the first few days of life is reported to be substantially influenced by antenatal and intrapartum factors, sepsis beyond the first few days is likely influenced to a greater extent by the post-natal environment, though the utility of this division across global

1  
2  
3 settings has been challenged.<sup>12</sup> The definition of EOS versus LOS also varies between  
4  
5 studies. The Australian and New Zealand Neonatal Network defines EOS as neonatal sepsis  
6  
7 with initial symptoms beginning <48 hours of life (2 days).<sup>13</sup> Common pathogens identified  
8  
9 in early-onset neonatal sepsis have been better characterised than those causing late-onset  
10  
11 sepsis in Australia, though both have been described in the United Kingdom.<sup>7,14</sup>  
12  
13

14  
15 In this study we aimed to report on antimicrobial prescribing for neonatal sepsis of all types  
16  
17 in neonates, using a national dataset from Australia. Antibiotic use and appropriateness for  
18  
19 indications other than sepsis, such as prophylaxis, are not included in this analysis.  
20  
21  
22  
23  
24  
25

## 26 Methods

27  
28 We obtained de-identified data from the NAPS database of point-prevalence prescribing  
29  
30 surveys for Australian hospitals from all 6 Australian states and 2 territories (1 January 2014  
31  
32 to 31 December 2018).<sup>15</sup> Participation in these surveys is voluntary and data are submitted  
33  
34 through a web-based interface to a central database.<sup>15</sup> Survey methodology has been  
35  
36 described previously.<sup>16,17</sup> Appropriateness assessments were conducted by trained local  
37  
38 surveyors as described previously.<sup>18,19</sup> A score of 1 or 2 is considered to be  
39  
40 'appropriate' and 3 or 4 as 'inappropriate' (Appendix,  
41  
42 Supplementary Figure 1). For this study, individual prescription data were  
43  
44 extracted for patients surveyed aged 0 days to less than 28 days of age where the indication  
45  
46 group for antibiotic was recorded as "sepsis" and weight was recorded (to enable dose  
47  
48 calculation). The principle unit of analysis was individual prescription. Dosing of  
49  
50 gentamicin and benzylpenicillin was rounded to whole mg/kg.  
51  
52 Year of survey was analysed by calendar year. We designated EOS by age criteria as sepsis  
53  
54 indication for antibiotics with age <2 completed days. LOS was defined by age ≥2 days at  
55  
56  
57  
58  
59  
60



1  
2  
3 antibiotic commencement or if age >7 days at audit date if antibiotic start date was missing.

4  
5 Prematurity was defined as gestational age <37 weeks. Dedicated children's  
6  
7 hospitals, maternity hospitals or combined maternity/  
8  
9 children's hospitals were classed as specialist hospitals.

10  
11  
12  
13 Ethics approval as a quality assurance project was obtained from the Melbourne Health  
14  
15 Human Research Ethics Committee to coordinate the NAPS (No. QA2013066).

### 16 17 18 **Patient involvement**

19  
20  
21 Patients were not involved in the design or analysis of this study.

### 22 23 24 **Statistical analysis**

25  
26  
27  
28 Categorical variables and proportions were summarized and compared between groups using  
29  
30 a Chi-squared test. A P value of 0.05 (two-tailed) was deemed statistically significant. Dosing  
31  
32 variability in mg/kg and antibiotic duration by groups was compared using Wilcoxon rank-  
33  
34 sum tests. Statistical analyses and graphs were done using Stata 16.0 (StataCorp, College  
35  
36 Station, TX, USA).

## 37 38 39 40 41 42 43 44 **Results**

### 45 46 47 **Demographics**

48  
49 Among 884 neonatal prescriptions between 1 January 2014 and 31 December 2018, 415  
50  
51 prescriptions (46.9%) were recorded as given for sepsis. These prescriptions were for 214  
52  
53 neonates from 39 hospitals. All Australian States and Territories were represented apart from  
54  
55 the Northern Territory. Hospitals included specialist women's hospitals or paediatric  
56  
57 hospitals with tertiary neonatal intensive care units, as well as general public and private  
58  
59  
60

1  
2  
3 hospitals. A large majority of included hospitals (88.7%) were in metropolitan areas. Female  
4 neonates accounted for 184 prescriptions (44.3%) and the rest were for males. The number of  
5 prescriptions varied by year from 56 in 2014 to 91 in 2018. The majority of prescriptions  
6 were for neonates <7 days of age (342, 82.4%). Where this could be assessed, 71% of  
7 prescriptions (245/345) were for EOS and 29% (100/345) for LOS. Premature neonates  
8 accounted for 123 prescriptions (54.4%). The median weight was 2.9kg (IQR 1.9-3.4).  
9 Demographic details are shown in full in Table 1.

### 21 **Antibiotic type and Duration**

22 The Drug Utilization 90% (DU90): the number of antibiotics accounting for 90% of usage  
23 when ranked by frequency, included a total of 5 antibiotics. In descending order these were  
24 gentamicin, benzylpenicillin, cefotaxime, ampicillin and flucloxacillin. There were 323  
25 (77.6%) prescriptions of either gentamicin or benzylpenicillin. One hundred and thirty-three  
26 neonates (62.1%) were prescribed both benzylpenicillin and gentamicin. Antibiotics most  
27 frequently prescribed are shown in Table 2 (complete list shown in Appendix Supplementary  
28 Table 1). At audit, 47.5% of antibiotics had been given for  $\geq 2$  days (Figure 1), though in only  
29 15 prescriptions (3.6%) among 9 (4.2%) neonates, microbiologically confirmed infection was  
30 documented (Table 3). Antibiotic duration was significantly longer in specialist hospitals  
31 (median 2 days, IQR 1-3 days) compared with non-specialist hospitals (median 1 day, IQR 1-  
32 1.5 days,  $P < 0.0001$ ) (Appendix, Supplementary Figure 2) but did not differ by  
33 metropolitan versus rural hospital prescription.

### 54 **Appropriateness and Guideline Compliance**

55 Overall 400/415 prescriptions (96.4%) were assessed by local hospital auditors as appropriate  
56 and 13 (3.1%) inappropriate; with 330 prescriptions (79.5%) assessed as compliant with local  
57  
58  
59  
60

1  
2  
3 guidelines and 53 prescriptions (12.8%) as compliant with national *Therapeutic Guidelines*.<sup>20</sup>

4  
5 Nineteen prescriptions (4.6%) were assessed as non-compliant with guidelines. Detailed  
6  
7 appropriateness and compliance assessment is displayed in Appendix, Supplementary Table

8  
9  
10 2. Appropriateness was similar for specialist and non-specialist hospitals (98% vs 95%  
11  
12 appropriate) but guideline compliance was significantly higher in specialist hospitals (97.3%  
13  
14 compared with 91.8%, respectively,  $P=0.013$ ). Metropolitan hospitals had higher  
15  
16 appropriateness compared with rural hospitals (98.1% vs 87.2%,  $P=0.0001$ ) and guideline  
17  
18 compliance (96.9% vs 83%,  $P<0.0001$ ).  
19  
20  
21  
22  
23

### 24 **Dosing variability – gentamicin and benzylpenicillin**

25  
26  
27 Gentamicin dosing and frequency information was available for 178 prescriptions. The dose  
28  
29 varied from 2-8mg/kg (median 5mg/kg, IQR 4-5mg/kg). Gentamicin dose variability is  
30  
31 shown in Figure 2a. Benzylpenicillin dosing and frequency information was available for 143  
32  
33 prescriptions. The dose varied 45-72mg/kg (median 60mg/kg, IQR 48-64). Benzylpenicillin  
34  
35 dose variability is shown in Figure 2b. Dosing frequency also varied, though the majority of  
36  
37 neonates received 24-hourly gentamicin and 12-hourly benzylpenicillin. Dosing for  
38  
39 benzylpenicillin did not differ by hospital location (metropolitan versus rural), or by  
40  
41 specialist/non-specialist hospital. Gentamicin dosing was significantly lower ( $P<0.0001$ ) in  
42  
43 non-specialist hospitals (median 4.4 mg/kg/dose, IQR 3.9-5 mg/kg/dose) compared with  
44  
45 specialist hospitals (median 5 mg/kg/dose, IQR 4.6-5.1 mg/kg/dose). Gentamicin dosing was  
46  
47 also significantly lower ( $P<0.0001$ ) in rural hospitals (median 3.9 mg/kg/dose, IQR 2.5-4.5  
48  
49 mg/kg/dose) compared with metropolitan hospitals (median 5 mg/kg/dose, IQR 4.5-5  
50  
51 mg/kg/dose).  
52  
53  
54  
55  
56  
57  
58  
59  
60

## Discussion

In this study, the largest nationwide analysis of prescribing for neonatal sepsis in Australia, we found a strong preference for use of gentamicin and benzylpenicillin for treatment of neonatal sepsis/risk of sepsis but substantial variation in dosing of these agents. The study included a broad range of gestational ages and a variety of hospital types across Australia, but most neonates treated for sepsis were <7 days of age. Only 4% of neonates had microbiologically confirmed infection. Auditor-assessed appropriateness and guideline compliance were high but varied by hospital type and location.

Large-scale analysis of antibiotic prescribing and appropriateness for neonatal sepsis has not been reported in Australia. Information on neonatal empiric guideline use<sup>21</sup> and prescribing<sup>22</sup> has been reported from selected large neonatal intensive care units but this excludes many health services providing neonatal care. Hospitals use a variety of different guidelines for selection and dosing of empiric antibiotic therapy in neonates.<sup>21-24</sup> Benzylpenicillin and gentamicin are recommended for empiric treatment of neonatal sepsis in current national guidelines<sup>20</sup> and are appropriate empiric therapy for the majority of organisms responsible for EOS in Australia.<sup>7</sup> This study confirms these are frequently used currently, though with considerable variation in administration.

In our study, only a small number of sepsis prescriptions (4%) were for microbiologically confirmed infections. While antibiotics may be life-saving, they are also associated with adverse effects, including impact on the neonate microbiome,<sup>25</sup> with potential long-term atopic and metabolic consequences of antibiotics in early life including asthma<sup>26</sup> and obesity.<sup>27</sup> Current challenges in standardizing therapy include a lack of data-driven consensus definition for neonatal sepsis and lack of sufficiently rapid, sensitive and specific diagnostic

1  
2  
3 tests during the early phase of illness.<sup>28</sup> More sensitive and specific rapid diagnostic tools,  
4  
5 requiring minimal sample volumes are required to further improve care and outcomes for  
6  
7 suspected neonatal sepsis.  
8  
9

10 Dosing variation in the small number of drugs commonly used to treat neonatal sepsis  
11  
12 represents an opportunity to standardize and potentially improve care. A survey of 6  
13  
14 Australian tertiary neonatal units conducted in 2012 demonstrated substantial variation in  
15  
16 dosing for vancomycin and gentamicin in neonates, with gentamicin, benzylpenicillin and  
17  
18 vancomycin the most commonly prescribed drugs for systemic therapy.<sup>22</sup> A survey of  
19  
20 NICUs from 21 European countries, with 586 systemic antibiotic prescriptions for infants up  
21  
22 to 90 days of age, reported a tendency to over-dosing of penicillins and under-dosing of  
23  
24 vancomycin and gentamicin, relative to guidelines.<sup>29</sup> Although we found variation both above  
25  
26 and below recommended doses for benzylpenicillin and gentamicin in neonates treated for  
27  
28 sepsis, we also found a tendency to underdosing of gentamicin in non-specialist and non-  
29  
30 metropolitan hospitals, a cause for concern. One potential source of dosing variation is use of  
31  
32 birth weight rather than measured weight in neonates and rounding of doses for drug dose  
33  
34 calculations. In one study of more than 9000 neonates over a 20-year period, weight error due  
35  
36 to digit bias (whereby round numbers are favoured) improved over 20 years but was still  
37  
38 evident in neonates between 1000 and 4500 grams at  $\leq 5\%$ .<sup>30</sup> Relative to body size, this  
39  
40 phenomenon accounts for additional variation not seen in the adult population, where  
41  
42 standardized doses are used, and the implications of this variation for research and practice  
43  
44 improvement remain insufficiently understood.  
45  
46  
47  
48  
49  
50  
51

52  
53 Although local and international guidelines available for management of neonatal sepsis are  
54  
55 available,<sup>31</sup> national guidelines for neonatal sepsis prescribing did not exist during the period  
56  
57 of this study. These are now available, however, with national *Therapeutic Guidelines*<sup>20</sup>  
58  
59 updated in mid-2019 to include recommendations for treatment of neonatal sepsis and  
60

1  
2  
3 selected other neonatal infections. These subscription guidelines are widely available in  
4  
5 Australian hospitals and contain evidence-based dosing recommendations, selected by expert  
6  
7 consensus group review and dosing aligned with recommendations from the Australasian  
8  
9 Neonatal Medicines Formulary (ANMF) group. The ANMF group provides freely available,  
10  
11 evidence-based and regularly updated medicine guidelines for neonates.<sup>32</sup> Both the  
12  
13 Australasian Neonatal Medicines Formulary (ANMF)<sup>32</sup> and *Therapeutic Guidelines*<sup>20</sup>  
14  
15 recommend dosing of 5mg/kg for gentamicin and 60mg/kg for benzylpenicillin (90mg/kg for  
16  
17 meningitis), with frequency dependent on gestational and postnatal age. These may serve as  
18  
19 references for future assessment of neonatal sepsis prescribing as national standard  
20  
21 recommendations.  
22  
23  
24  
25  
26

27 On audit date, almost 50% of antibiotics had been given for 2 or more completed days,  
28  
29 though only 4% of neonates had microbiologically confirmed infection documented. This  
30  
31 may represent excessive antibiotic therapy and provides an opportunity for quality  
32  
33 improvement, given that the majority of potential pathogens in neonatal sepsis are identified  
34  
35 within 36-48 hours.<sup>33</sup> Hospital antimicrobial stewardship teams may not include neonatal  
36  
37 pharmacologists or neonatal infection specialists and thus the recently nationally available  
38  
39 guidelines for sepsis and antimicrobial use in neonates, listed above, may provide a more  
40  
41 robust framework for assessment and promotion of the most appropriate therapy. Since most  
42  
43 prescribing for neonatal sepsis in Australia includes only a small number of drugs, as we  
44  
45 have shown, efforts to improve consistency of prescribing, particularly with regard to dosing  
46  
47 in sepsis therapy, should be possible.  
48  
49  
50  
51  
52

53 Over 95% of therapy for neonatal sepsis was deemed appropriate by local assessors and over  
54  
55 90% deemed compliant with guidelines in this study. This is similar to a previous Australian  
56  
57 study in which only 4% of prescriptions were considered inappropriate.<sup>22</sup> Compliance was  
58  
59 also deemed high in this study, largely based on compliance with local guidelines. Although  
60

1  
2  
3 12.8% of prescriptions were reported as compliant with *Therapeutic Guidelines*, these  
4 specifically excluded recommendations for neonates at the time of this study. Given the  
5  
6 substantial dosing variation and potentially excessive durations described above, these  
7  
8 findings suggest challenges with local assessment of appropriateness and guideline  
9  
10 compliance of therapy for sepsis in neonates. It is difficult to say whether the degree of  
11  
12 variation in prescribing demonstrated here led to suboptimal outcomes. Nonetheless, we  
13  
14 question whether such diversity in dosing for a handful of well-known drugs can be said to be  
15  
16 optimal therapy.  
17  
18  
19  
20  
21

22  
23 In this study we were unable to compare prescribing with local guidelines used within each  
24  
25 hospital, and this is a substantial limitation, though it reinforces our point that diversity of  
26  
27 guidelines is a major challenge to achieving standardized prescribing. We also do not  
28  
29 currently have information on the proportion of neonates in each hospital who were not  
30  
31 prescribed antibiotics. Weight was not a mandatory field in the NAPS tool at time of survey  
32  
33 and we did not include neonates who did not have a weight recorded, as we required this to  
34  
35 calculate doses by weight for this study. For future surveys, mandatory inclusion of weight  
36  
37 could improve the tool's utility for antimicrobial prescribing to neonates and children. The  
38  
39 data here may not be applicable to countries with high rates of drug-resistant organisms  
40  
41 causing neonatal sepsis<sup>12,34</sup> as these are likely to have different prescribing choices. In this  
42  
43 study, we did not have access to local antibiograms but the proportions of gentamicin and  
44  
45 penicillin used here is in keeping with available national data showing relatively low rates of  
46  
47 drug-resistant pathogens in neonatal sepsis.<sup>35</sup>  
48  
49  
50  
51  
52  
53  
54  
55  
56  
57  
58  
59  
60

## Conclusions

In this nationwide survey we have identified substantial variability in dosing of benzylpenicillin and gentamicin, the two most commonly prescribed antibiotics for neonatal sepsis in this study. Efforts to optimise therapy for treatment of neonatal sepsis and reach consensus for therapy, including understanding prescribing practices and implementing national guidelines, are recommended.

## Acknowledgements

We acknowledge the support of the Australian Commission for Safety and Quality in Health Care, the NAPS staff and program and NAPS assessors and participating hospitals.

## Funding

This work was supported by a PhD scholarship from the University of Melbourne for BM. Since 2013 the Australian Commission on Safety and Quality in Health Care have supported the NAPS program for the AURA Surveillance System. CCB is supported by a NHMRC Career Development Fellowship (APP1111596). There was no direct funding for the preparation or revision of this manuscript. NS is supported by a PhD scholarship from the Australian Commonwealth Government.

## Transparency Declaration

All authors declare that they have no competing interests, financial or otherwise.



### Contributorship statement

BM planned and conducted the study, reviewed the data and co-wrote the manuscript, submitted the study and is responsible for overall content. CC reviewed the data and co-wrote the manuscript. NS planned the study, reviewed the data and co-wrote the manuscript. RJ reviewed the data and co-wrote the manuscript. CJ reviewed the data and co-wrote the manuscript. PK reviewed the data and co-wrote the manuscript. CB reviewed the data and co-wrote the manuscript. KT planned the study, reviewed the data and co-wrote the manuscript.

## What is already known on this topic

(a maximum of 3 brief statements (no more than 25 words per statement))

- Neonatal sepsis is an important cause of morbidity and mortality globally
- There is considerable uncertainty about antibiotic prescribing and optimal regimens to treat neonatal sepsis
- Current challenges include lack of epidemiological data to inform prescribing improvements

## What this study adds

(a maximum of 3 brief statements (no more than 25 words per statement))

- Benzylpenicillin and gentamicin accounted for more than three quarters of antibiotics prescribed for sepsis among Australian neonates, only 4% of whom had microbiologically confirmed infection.
- There was considerable variation in dosing for both benzylpenicillin and gentamicin
- There is an opportunity to improve prescribing and reduce unnecessary variation by targeting a small number of drugs in the treatment of neonatal sepsis

## References

1. Estimation UNI-aGfCM, Hug L, Sharrow D, et al. *Levels & Trends in Child Mortality: Report 2018, Estimates Developed by the*. United Nations Children's Fund; 2018.
2. UNIGME. *Levels & Trends in Child Mortality Report 2019*. 2019. <https://childmortality.org/reports>. Accessed 13/11/2019.
3. AIHW. Australian Institute of Health and Welfare 2019. Stillbirths and neonatal deaths in Australia 2015 and 2016: in brief. Perinatal statistics series no. 36. Cat. no. PER 102. In. Canberra: AIHW; 2019.
4. Raymond SL, Stortz JA, Mira JC, Larson SD, Wynn JL, Moldawer LL. Immunological Defects in Neonatal Sepsis and Potential Therapeutic Approaches. *Frontiers in Pediatrics*. 2017;5(14).
5. Ghazal P, Dickinson P, Smith CL. Early life response to infection. *Current opinion in infectious diseases*. 2013;26(3):213-218.
6. Gerdes JS. Diagnosis and management of bacterial infections in the neonate. *Pediatric Clinics*. 2004;51(4):939-959.
7. Singh T, Barnes EH, Isaacs D. Early-onset neonatal infections in Australia and New Zealand, 2002–2012. *Archives of Disease in Childhood-Fetal and Neonatal Edition*. 2019;104(3):F248-F252.
8. Fjalstad JW, Stensvold HJ, Bergseng H, et al. Early-onset sepsis and antibiotic exposure in term infants: a nationwide population-based study in Norway. *The Pediatric infectious disease journal*. 2016;35(1):1-6.
9. Schulman J, Profit J, Lee HC, et al. Variations in neonatal antibiotic use. *Pediatrics*. 2018;142(3):e20180115.
10. Lavoie PM, Popescu CR, Molyneux EM, et al. Rethinking management of neonates at risk of sepsis. *The Lancet*. 2019;394(10195):279-281.
11. Strunk T, Buchiboyina A, Sharp M, Nathan E, Doherty D, Patole S. Implementation of the Neonatal Sepsis Calculator in an Australian Tertiary Perinatal Centre. *Neonatology*. 2018;113(4):379-382.
12. Chaurasia S, Sivanandan S, Agarwal R, Ellis S, Sharland M, Sankar MJ. Neonatal sepsis in South Asia: huge burden and spiralling antimicrobial resistance. *BMJ*. 2019;364:k5314.
13. Chow SSW, Creighton, P., Chambers, G.M., Lui, K. *Report of the Australian and New Zealand Neonatal Network 2017*. Sydney2019.
14. Cailles B, Kortsalioudaki C, BATTERY J, et al. Epidemiology of UK neonatal infections: the neonIN infection surveillance network. *Archives of Disease in Childhood-Fetal and Neonatal Edition*. 2018;103(6):F547-F553.
15. National Centre for Antimicrobial Stewardship and Australian Commission on Safety and Quality in Health Care. Antimicrobial Prescribing Practice in Australian Hospitals: Results of the 2016 Hospital National Antimicrobial Prescribing Survey. In. Sydney: ACSQHC; 2018.
16. National Centre for Antimicrobial Stewardship and Australian Commission on Safety and Quality in Health Care. Antimicrobial prescribing practice in Australian hospitals: results of the 2017 Hospital National Antimicrobial Prescribing Survey. In. Sydney: ACSQHC; 2018.

17. McMullan BJ, Hall L, James R, et al. Antibiotic appropriateness and guideline adherence in hospitalized children: results of a nationwide study. *Journal of Antimicrobial Chemotherapy*. 2019.
18. James R, Upjohn L, Cotta M, et al. Measuring antimicrobial prescribing quality in Australian hospitals: development and evaluation of a national antimicrobial prescribing survey tool. *J Antimicrob Chemother*. 2015;70(6):1912-1918.
19. Constantinescu IC, Popa OP, Popa LO, Cobzaru I, B MDK, Adam C. A new feather mite species of the genus *Trouessartia* Canestrini, 1899 (Acarina, Trouessartiidae) - an integrative description (morphology and DNA barcoding data). *Zookeys*. 2018(789):19-35.
20. Groups" AE. Therapeutic Guidelines: antibiotic, version 16. In: Therapeutic Guidelines; 2019.
21. Carr JP, Burgner DP, Hardikar RS, Buttery JP. Empiric antibiotic regimens for neonatal sepsis in Australian and New Zealand neonatal intensive care units. *J Paediatr Child Health*. 2017;53(7):680-684.
22. Osowicki J, Gwee A, Noronha J, et al. Australia-wide point prevalence survey of antimicrobial prescribing in neonatal units: how much and how good? *The Pediatric infectious disease journal*. 2015;34(8):e185-e190.
23. Leroux S, Zhao W, Bétrémieux P, Pladys P, Saliba E, Jacqz-Aigrain E. Therapeutic guidelines for prescribing antibiotics in neonates should be evidence-based: a French national survey. *Archives of disease in childhood*. 2015;100(4):394-398.
24. Liem TBY, Krediet TG, Fler A, Egberts TCG, Rademaker CMA. Variation in antibiotic use in neonatal intensive care units in the Netherlands. *Journal of Antimicrobial Chemotherapy*. 2010;65(6):1270-1275.
25. Cotten CM. Adverse consequences of neonatal antibiotic exposure. *Curr Opin Pediatr*. 2016;28(2):141-149.
26. Droste JHJ, Wieringa MH, Weyler JJ, Nelen VJ, Vermeire PA, Van Bever HP. Does the use of antibiotics in early childhood increase the risk of asthma and allergic disease? *Clinical & Experimental Allergy*. 2000;30(11):1548-1553.
27. Cox LM, Blaser MJ. Antibiotics in early life and obesity. *Nature Reviews Endocrinology*. 2015;11(3):182.
28. Vergnano S, Seale AC, Fitchett EJ, Sharland M, Heath PT. Serious bacterial infections in neonates: improving reporting and case definitions. *International health*. 2017;9(3):148-155.
29. Metsvaht T, Nellis G, Varendi H, et al. High variability in the dosing of commonly used antibiotics revealed by a Europe-wide point prevalence study: implications for research and dissemination. *BMC pediatrics*. 2015;15(1):41.
30. Emmerson AJ, Roberts SA. Rounding of birth weights in a neonatal intensive care unit over 20 years: an analysis of a large cohort study. *BMJ open*. 2013;3(12):e003650-e003650.
31. Liem TBY, Slob EMA, Termote JUM, Wolfs TFW, Egberts ACG, Rademaker CMA. Comparison of antibiotic dosing recommendations for neonatal sepsis from established reference sources. *International journal of clinical pharmacy*. 2018;40(2):436-443.
32. Bolisetty S. Australasian Neonatal Medicines Formulary (ANMF). 2019; <https://www.seslhd.health.nsw.gov.au/royal-hospital-for-women/australasian-neonatal-medicines-formulary-anmf>. Accessed 10 July 2019, 2019.

- 1
- 2
- 3
- 4 33. Klingenberg C, Kornelisse RF, Buonocore G, Maier RF, Stocker M. Culture-Negative
- 5 Early-Onset Neonatal Sepsis - At the Crossroad Between Efficient Sepsis Care and
- 6 Antimicrobial Stewardship. *Frontiers in pediatrics*. 2018;6:285-285.
- 7 34. Folgori L, Ellis SJ, Bielicki JA, Heath PT, Sharland M, Balasegaram M. Tackling
- 8 antimicrobial resistance in neonatal sepsis. *The Lancet Global Health*.
- 9 2017;5(11):e1066-e1068.
- 10 35. ACSQHC. AURA 2017: second Australian report on antimicrobial use and resistance
- 11 in human health. In. Sydney: Australian Commission on Safety and Quality in Health
- 12 Care; 2017.
- 13
- 14
- 15
- 16
- 17
- 18
- 19
- 20
- 21
- 22
- 23
- 24
- 25
- 26
- 27
- 28
- 29
- 30
- 31
- 32
- 33
- 34
- 35
- 36
- 37
- 38
- 39
- 40
- 41
- 42
- 43
- 44
- 45
- 46
- 47
- 48
- 49
- 50
- 51
- 52
- 53
- 54
- 55
- 56
- 57
- 58
- 59
- 60

## Figures and Tables

Table 1: Demographic Details

| DEMOGRAPHIC                       | Total prescriptions<br>(415) | (%)   |
|-----------------------------------|------------------------------|-------|
| <b>Gestational age</b>            |                              |       |
| <25 weeks                         | 20                           | 4.8%  |
| 25-<30 weeks                      | 32                           | 7.7%  |
| 30-<35 weeks                      | 52                           | 12.5% |
| 35-<37 weeks                      | 21                           | 5.1%  |
| >=37 weeks                        | 101                          | 24.3% |
| (not stated)                      | 189                          | 45.5% |
| <b>Postnatal age</b>              |                              |       |
| <7 days                           | 342                          | 82.4% |
| 7-<15 days                        | 38                           | 9.2%  |
| 15-<28 days                       | 35                           | 8.4%  |
| <b>Sex: Female</b>                | 184                          | 44.3% |
| <b>Median weight in kg (IQR)</b>  | 2.9 (1.9-3.4)                | NA    |
| <b>Records by year of survey</b>  |                              |       |
| 2014                              | 56                           | 13.5% |
| 2015                              | 118                          | 28.4% |
| 2016                              | 63                           | 15.2% |
| 2017                              | 87                           | 21.0% |
| 2018                              | 91                           | 21.9% |
| <b>In NICU/ICU*</b>               | 174                          | 41.8% |
| <b>Hospital Type</b>              |                              |       |
| Specialist Women's                | 161                          | 38.8% |
| Specialist Children's             | 76                           | 18.3% |
| Specialist Women's and Children's | 31                           | 7.5%  |
| Other Public Hospitals            | 134                          | 32.2% |
| Private Hospitals                 | 6                            | 1.5%  |
| Unpeered/unknown                  | 7                            | 1.7%  |
| <b>Hospital Location</b>          |                              |       |
| Major city                        | 368                          | 88.7% |
| Inner regional                    | 28                           | 6.7%  |
| Outer regional                    | 19                           | 4.6%  |

\*NICU/ICU status not stated for 77 prescriptions

Table 2: Top 5 Antibiotics by Frequency Prescribed and Sepsis Type

| <b>Antibiotic: All</b>          | <b>Prescriptions<br/>Total 415 n (%)</b> | <b>Cumulative<br/>Percentage</b> |
|---------------------------------|------------------------------------------|----------------------------------|
| Gentamicin                      | 179 (43.1)                               | 43.1                             |
| Benzylpenicillin (Penicillin G) | 144 (34.7)                               | 77.8                             |
| Cefotaxime                      | 26 (6.3)                                 | 84.1                             |
| Ampicillin                      | 18 (4.3)                                 | 88.4                             |
| Flucloxacillin                  | 13 (3.1)                                 | 91.6                             |
|                                 |                                          |                                  |
| <b>Antibiotic: EOS*</b>         | <b>Prescriptions<br/>Total 245 n (%)</b> | <b>Cumulative<br/>Percentage</b> |
| Gentamicin                      | 119 (48.6)                               | 48.6                             |
| Benzylpenicillin (Penicillin G) | 100 (40.8)                               | 89.4                             |
| Ampicillin                      | 12 (4.9)                                 | 94.3                             |
| Amoxicillin                     | 5 (2)                                    | 96.3                             |
| Benzathine penicillin           | 3 (1.2)                                  | 97.6                             |
|                                 |                                          |                                  |
| <b>Antibiotic: LOS*</b>         | <b>Prescriptions<br/>Total 100 n (%)</b> | <b>Cumulative<br/>Percentage</b> |
| Gentamicin                      | 31 (31)                                  | 31                               |
| Cefotaxime                      | 18 (18)                                  | 49                               |
| Benzylpenicillin (Penicillin G) | 16 (16)                                  | 65                               |
| Vancomycin                      | 11 (11)                                  | 76                               |
| Flucloxacillin                  | 10 (10)                                  | 86                               |

\*EOS=early-onset sepsis; LOS=late-onset sepsis

Table 3 Neonates with microbiologically confirmed infection

| Microbiologically confirmed infection-type    | Prescriptions(%) | Neonates(%) |
|-----------------------------------------------|------------------|-------------|
| Coagulase-negative staphylococcal bacteraemia | 7 (1.7)          | 5 (2.3)     |
| Candidaemia*                                  | 4 (1.0)          | 2 (0.9)     |
| Other**                                       | 4 (1.0)          | 2 (0.9)     |
| Total                                         | 15 (3.6)         | 9 (4.2)     |

\*One infant had *Candida glabrata* and coagulase-negative *Staphylococcus* in blood cultures and was treated with liposomal Amphotericin B. The other had *Candida albicans* in blood culture. This infant was treated with fluconazole for indication “candidaemia” and benzylpenicillin and cefotaxime for indication “sepsis”.

\*\*One infant had gram-positive cocci detected in blood culture, awaiting species confirmation at time of audit, the other had pneumonia with *Klebsiella oxytoca* isolated from endotracheal tube aspirate culture

Figure 1: Duration of therapy (completed antibiotic days at audit date)

Figure 2: Individual dose ranges for gentamicin and benzylpenicillin (whole mg/kg)

\*2a, Gentamicin (n=178) One 52mg/kg dose omitted from table, as apparent 10-fold error

\*2b, Benzylpenicillin (n=143) One 6mg/kg dose omitted from figure, as apparent 10-fold error



1  
2  
3  
4  
5  
6  
7  
8  
9  
10  
11  
12  
13  
14  
15  
16  
17  
18  
19  
20  
21  
22  
23  
24  
25  
26  
27  
28  
29  
30  
31  
32  
33  
34  
35  
36  
37  
38  
39  
40  
41  
42  
43  
44  
45  
46  
47  
48  
49  
50  
51  
52  
53  
54  
55  
56  
57  
58  
59  
60

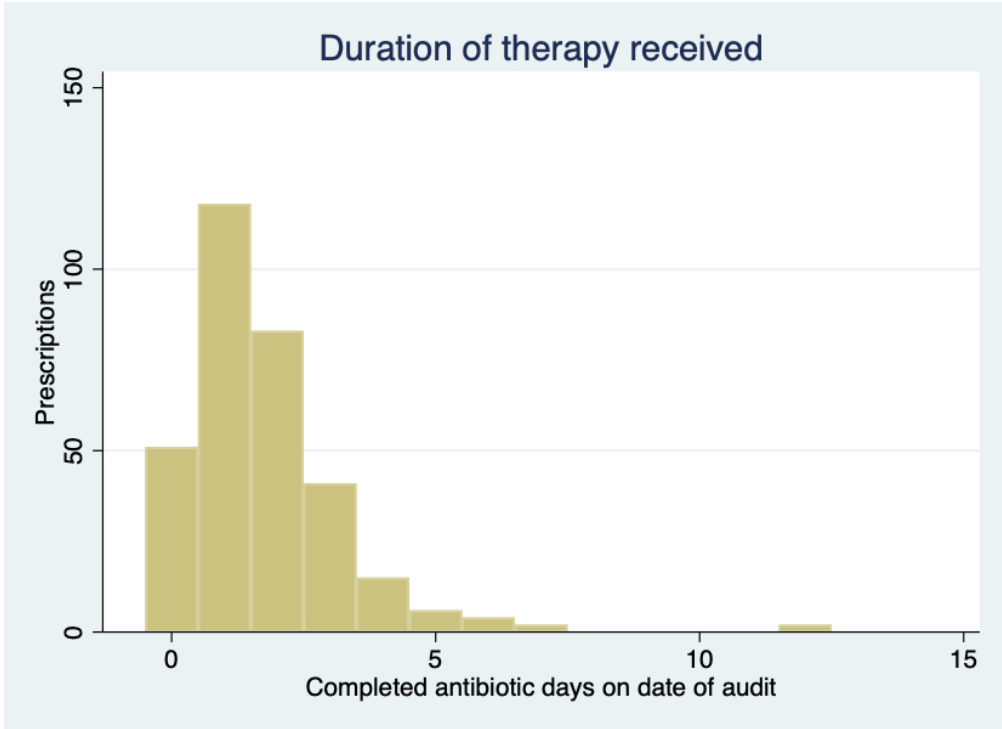

1  
2  
3  
4  
5  
6  
7  
8  
9  
10  
11  
12  
13  
14  
15  
16  
17  
18  
19  
20  
21  
22  
23  
24  
25  
26  
27  
28  
29  
30  
31  
32  
33  
34  
35  
36  
37  
38  
39  
40  
41  
42  
43  
44  
45  
46  
47  
48  
49  
50  
51  
52  
53  
54  
55  
56  
57  
58  
59  
60

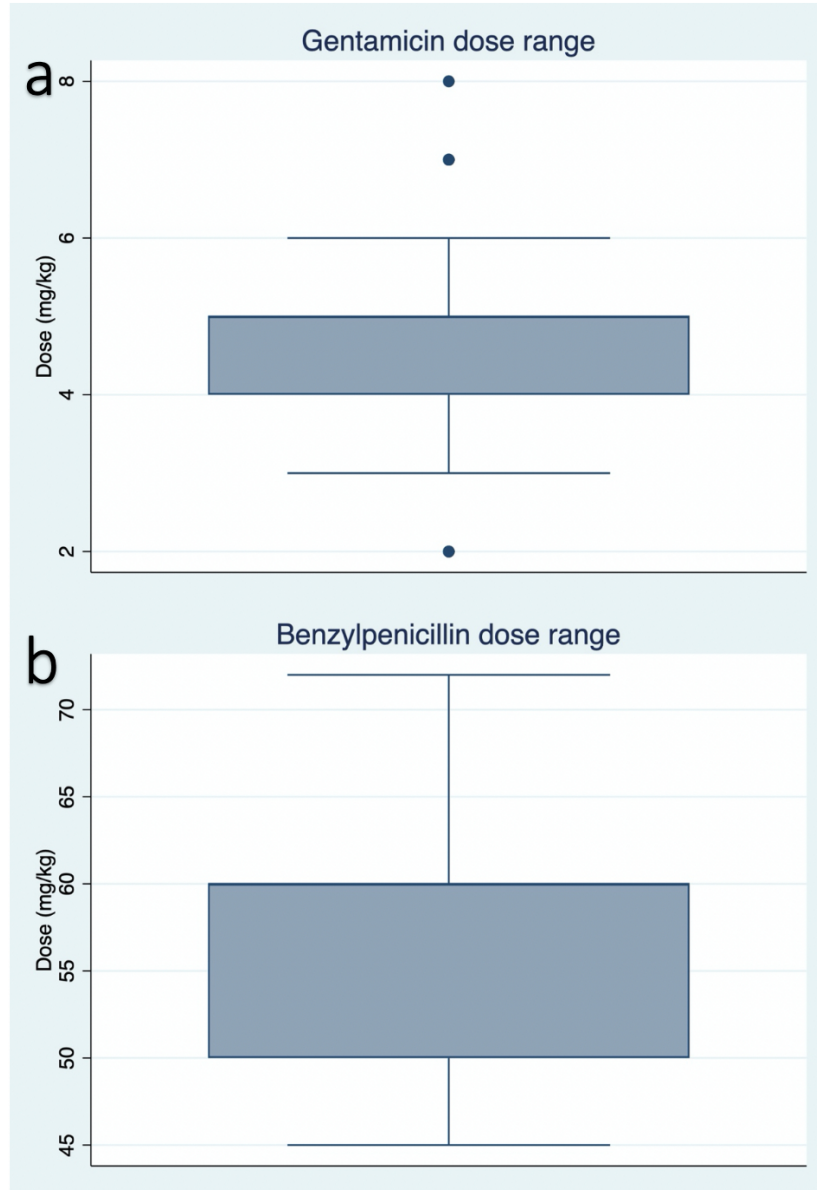

## Appendix: Supplementary Material

HOSPITAL NAPS National Antimicrobial Prescribing Survey

Appropriateness definitions

GUIDANCE NCAS

|               |                        | If endorsed guidelines are <u>present</u>                                                                                                                                                                                                                                                                                                                                                                                                                                                                                                              | If endorsed guidelines are <u>absent</u>                                                                                                                                                                                                                                                                                                                          |
|---------------|------------------------|--------------------------------------------------------------------------------------------------------------------------------------------------------------------------------------------------------------------------------------------------------------------------------------------------------------------------------------------------------------------------------------------------------------------------------------------------------------------------------------------------------------------------------------------------------|-------------------------------------------------------------------------------------------------------------------------------------------------------------------------------------------------------------------------------------------------------------------------------------------------------------------------------------------------------------------|
| Appropriate   | 1 Optimal <sup>1</sup> | Antimicrobial prescription follows either the Therapeutic Guidelines <sup>2</sup> or endorsed local guidelines optimally, including antimicrobial choice, dosage, route and duration <sup>3</sup>                                                                                                                                                                                                                                                                                                                                                      | The antimicrobial prescription has been reviewed and endorsed by an infectious diseases clinician or a clinical microbiologist<br>OR<br>The prescribed antimicrobial will cover the likely causative or cultured pathogens <b>and</b> there is not a narrower spectrum or more appropriate antimicrobial choice, dosage, route or duration <sup>3</sup> available |
|               | 2 Adequate             | Antimicrobial prescription does not optimally follow the Therapeutic Guidelines <sup>2</sup> or endorsed local guidelines, including antimicrobial choice, dosage, route or duration <sup>3</sup> , however, is a <b>reasonable</b> alternative choice for the likely causative or cultured pathogens<br>OR<br>For surgical prophylaxis, as above <b>and</b> duration <sup>3</sup> is less than 24 hours                                                                                                                                               | Antimicrobial prescription including antimicrobial choice, dosage, route and duration <sup>3</sup> is not the most optimal, however, is a <b>reasonable</b> alternative choice for the likely causative or cultured pathogens<br>OR<br>For surgical prophylaxis, as above <b>and</b> duration <sup>3</sup> is less than 24 hours                                  |
| Inappropriate | 3 Suboptimal           | There may be a mild or non-life-threatening allergy mismatch<br>OR<br>Antimicrobial prescription including antimicrobial choice, dosage, route and duration <sup>3</sup> , is an <b>unreasonable</b> choice for the likely causative or cultured pathogens, including:<br>• spectrum excessively broad, unnecessary overlap in spectrum of activity, dosage excessively high or duration excessively long<br>• failure to appropriately de-escalate with microbiological results                                                                       |                                                                                                                                                                                                                                                                                                                                                                   |
|               | 4 Inadequate           | Antimicrobial prescription including antimicrobial choice, dosage, route or duration <sup>3</sup> is <b>unlikely</b> to treat the likely causative or cultured pathogens<br>OR<br>The documented or presumed indication does not require <b>any</b> antimicrobial treatment<br>OR<br>There may be a severe or possibly life-threatening allergy mismatch, or the potential risk of toxicity due to drug interaction<br>OR<br>For surgical prophylaxis, the duration <sup>3</sup> is greater than 24 hours (except where local guidelines endorse this) |                                                                                                                                                                                                                                                                                                                                                                   |
|               | 5 Not assessable       | The indication is not documented and unable to be determined from the notes<br>OR<br>The notes are not comprehensive enough to assess appropriateness<br>OR<br>The patient is too complex, due to multiple co-morbidities, allergies or microbiology results, etc.                                                                                                                                                                                                                                                                                     |                                                                                                                                                                                                                                                                                                                                                                   |

<sup>1</sup> Taking into account acceptable changes due to the patient's weight or renal function, if this information is available  
<sup>2</sup> Antibiotic Expert Group. Therapeutic Guidelines: Antibiotic. Version 15 (2014), or online version  
<sup>3</sup> Duration should only be assessed if the guidelines state a recommended duration and the antimicrobial has already been dispensed for longer than this, or if there is a clear planned 'end date' documented

Doc:HNAPS:AD.v6.1; 20161117

## Supplementary Figure 1: Definitions of appropriate prescribing

## Supplementary Table 1: Antibiotics by Frequency Prescribed

| Antibiotic                      | Prescriptions* | Percentage | Cumulative Percentage |
|---------------------------------|----------------|------------|-----------------------|
| Gentamicin                      | 179            | 43.1       | 43.1                  |
| Benzylpenicillin (Penicillin G) | 144            | 34.7       | 77.8                  |
| Cefotaxime                      | 26             | 6.3        | 84.1                  |
| Ampicillin                      | 18             | 4.3        | 88.4                  |
| Flucloxacillin                  | 13             | 3.1        | 91.6                  |
| Vancomycin                      | 13             | 3.1        | 94.7                  |
| Amoxicillin (Amoxycillin)       | 9              | 2.2        | 96.9                  |
| Meropenem                       | 6              | 1.45       | 98.3                  |
| Benzathine penicillin           | 4              | 0.96       | 99.3                  |
| Amphotericin B liposomal        | 1              | 0.24       | 99.5                  |
| Azithromycin                    | 1              | 0.24       | 99.8                  |
| Ceftriaxone                     | 1              | 0.24       | 100                   |

\*Total=415 prescriptions in 214 neonates

Supplementary Table 2: Antibiotic Appropriateness and Compliance with Guidelines

| <b>Appropriateness*</b>                      | <b>Frequency**</b> | <b>Percentage</b> |
|----------------------------------------------|--------------------|-------------------|
| 1-Optimal                                    | 373                | 89.9              |
| 2-Adequate                                   | 27                 | 6.5               |
| 3-Suboptimal                                 | 11                 | 2.7               |
| 4-Inadequate                                 | 2                  | 0.5               |
| 5-Not Assessable                             | 2                  | 0.5               |
|                                              |                    |                   |
| <b>Compliance with Guidelines*</b>           | <b>Frequency**</b> | <b>Percentage</b> |
| Compliant with locally endorsed guidelines   | 330                | 79.5              |
| Compliant with <i>Therapeutic Guidelines</i> | 53                 | 12.8              |
| Non-compliant with guidelines                | 19                 | 4.6               |
| Directed therapy                             | 7                  | 1.7               |
| No guidelines available                      | 4                  | 1                 |
| Not assessable                               | 2                  | 0.5               |

\*These are assessed by trained local auditors and categories are mutually exclusive

\*\*N=415 prescriptions

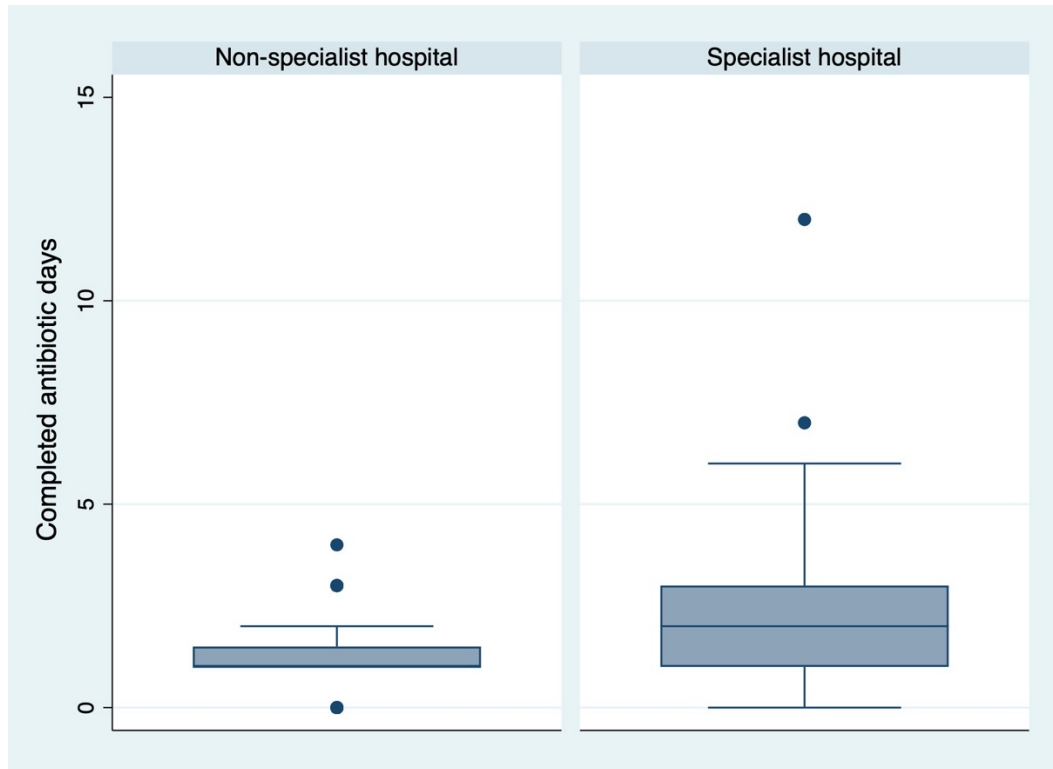

Supplementary Figure 2: Antibiotic duration by specialist and non-specialist hospital

Antibiotic duration in specialist hospitals: median 2 days (IQR 1-3 days), in non-specialist hospitals median 1 day (IQR 1-1.5 days),  $P < 0.0001$ .

# BMJ Paediatrics Open

## Antibiotic prescribing in neonatal sepsis: an Australian nationwide survey

|                               |                                                                                                                                                                                                                                                                                                                                                                                                                                                                                                                                                                                                                     |
|-------------------------------|---------------------------------------------------------------------------------------------------------------------------------------------------------------------------------------------------------------------------------------------------------------------------------------------------------------------------------------------------------------------------------------------------------------------------------------------------------------------------------------------------------------------------------------------------------------------------------------------------------------------|
| Journal:                      | <i>BMJ Paediatrics Open</i>                                                                                                                                                                                                                                                                                                                                                                                                                                                                                                                                                                                         |
| Manuscript ID                 | bmjpo-2020-000643.R1                                                                                                                                                                                                                                                                                                                                                                                                                                                                                                                                                                                                |
| Article Type:                 | Original research                                                                                                                                                                                                                                                                                                                                                                                                                                                                                                                                                                                                   |
| Date Submitted by the Author: | 24-Feb-2020                                                                                                                                                                                                                                                                                                                                                                                                                                                                                                                                                                                                         |
| Complete List of Authors:     | McMullan, Brendan; Sydney Children's Hospital Randwick, Immunology and Infectious Diseases<br>Cooper, Celia; Women's and Children's Hospital, Department of Infectious Diseases<br>Spotswood, Naomi; Burnet Institute<br>James, Rodney; National Centre for Antimicrobial Stewardship<br>Jones, Cheryl; The University of Sydney<br>Konecny, Pamela; St George Hospital, Kogarah, Infectious Diseases, Immunology and Sexual Health<br>Blyth, Christopher; University of Western Australia, School of Paediatrics and Child Health<br>Karen, Thursky; Infectious Diseases Service and Peter MacCallum Cancer Centre |
| Keywords:                     | Epidemiology, Infectious Diseases, Neonatology, Therapeutics                                                                                                                                                                                                                                                                                                                                                                                                                                                                                                                                                        |
|                               |                                                                                                                                                                                                                                                                                                                                                                                                                                                                                                                                                                                                                     |

SCHOLARONE™  
Manuscripts



I, the Submitting Author has the right to grant and does grant on behalf of all authors of the Work (as defined in the below author licence), an exclusive licence and/or a non-exclusive licence for contributions from authors who are: i) UK Crown employees; ii) where BMJ has agreed a CC-BY licence shall apply, and/or iii) in accordance with the terms applicable for US Federal Government officers or employees acting as part of their official duties; on a worldwide, perpetual, irrevocable, royalty-free basis to BMJ Publishing Group Ltd ("BMJ") its licensees and where the relevant Journal is co-owned by BMJ to the co-owners of the Journal, to publish the Work in this journal and any other BMJ products and to exploit all rights, as set out in our [licence](#).

The Submitting Author accepts and understands that any supply made under these terms is made by BMJ to the Submitting Author unless you are acting as an employee on behalf of your employer or a postgraduate student of an affiliated institution which is paying any applicable article publishing charge ("APC") for Open Access articles. Where the Submitting Author wishes to make the Work available on an Open Access basis (and intends to pay the relevant APC), the terms of reuse of such Open Access shall be governed by a Creative Commons licence – details of these licences and which [Creative Commons](#) licence will apply to this Work are set out in our licence referred to above.

Other than as permitted in any relevant BMJ Author's Self Archiving Policies, I confirm this Work has not been accepted for publication elsewhere, is not being considered for publication elsewhere and does not duplicate material already published. I confirm all authors consent to publication of this Work and authorise the granting of this licence.

# Antibiotic prescribing in neonatal sepsis: an Australian nationwide survey

**Authors:** Brendan J McMullan<sup>1,2,3</sup>, Celia Cooper<sup>4</sup>, Naomi Spotswood<sup>5,6,7</sup>, Rodney James<sup>8</sup>, Cheryl A Jones<sup>9,10,11</sup>, Pamela Konecny<sup>12,13</sup>, Christopher C Blyth<sup>14,15,16,17</sup>, Karin Thursky<sup>1,6,8,18</sup>, on behalf of the National Antimicrobial Prescribing Survey (NAPS)

**Corresponding Author:** Dr. Brendan J McMullan

Department of Immunology and Infectious Diseases, Sydney Children's Hospital, High St, Randwick, NSW, 2031 Australia

Phone: 61293821508

Fax: 61293821580

Email: brendanoch@yahoo.co.uk

## Author Affiliations:

1. National Centre for Infections in Cancer, University of Melbourne, Melbourne, Australia
2. Department of Immunology and Infectious Diseases, Sydney Children's Hospital, Randwick, Sydney, Australia
3. School of Women's and Children's Health, University of New South Wales, Sydney, Australia
4. Women's and Children's Hospital, Adelaide, Australia
5. Burnet Institute, Melbourne, Australia



- 1
  - 2
  - 3
  - 4
  - 5
  - 6
  - 7
  - 8
  - 9
  - 10
  - 11
  - 12
  - 13
  - 14
  - 15
  - 16
  - 17
  - 18
  - 19
  - 20
  - 21
  - 22
  - 23
  - 24
  - 25
  - 26
  - 27
  - 28
  - 29
  - 30
  - 31
  - 32
  - 33
  - 34
  - 35
  - 36
  - 37
  - 38
  - 39
  - 40
  - 41
  - 42
  - 43
  - 44
  - 45
  - 46
  - 47
  - 48
  - 49
  - 50
  - 51
  - 52
  - 53
  - 54
  - 55
  - 56
  - 57
  - 58
  - 59
  - 60
6. Department of Medicine, University of Melbourne, Australia
  7. Department of Paediatrics, Royal Hobart Hospital, Hobart, Australia.
  8. National Centre for Antimicrobial Stewardship, The Peter Doherty Institute for  
Infection and Immunity, Melbourne, Australia
  9. Faculty of Medicine and Health, University of Sydney, Sydney, Australia
  10. Murdoch Children's Research Institute, Melbourne, Australia
  11. Department of Paediatrics, University of Melbourne, Melbourne, Australia
  12. Department of Infectious Diseases, Immunology & Sexual Health, St George  
Hospital, Kogarah, Sydney, Australia
  13. St George and Sutherland Clinical School, University of New South Wales, Sydney,  
Australia
  14. School of Medicine, University of Western Australia, Perth, Australia
  15. Wesfarmers Centre of Vaccines and Infectious Diseases, Telethon Kids Institute,  
Perth, Australia
  16. Department of Paediatric Infectious Diseases, Perth Children's Hospital, Perth,  
Australia
  17. Department of Microbiology, PathWest Laboratory Medicine, QEII Medical Centre,  
Perth, Australia
  18. Victorian Infectious Diseases Service, The Peter Doherty Institute for Infection and  
Immunity, Melbourne, Australia

**Keywords: Epidemiology; Infectious Diseases; Neonatology; Therapeutics**

**Word count: 2736 words**

## Abstract

**Objective:** To evaluate quality and variation in antibiotic prescribing for neonatal sepsis.

**Design:** We analysed prescribing in hospitalized neonates, using the National Antimicrobial Prescribing Survey (NAPS) in Australian neonates from 1 January 2014 to 31 December 2018.

**Setting:** Data from antibiotic point prevalence surveys performed in hospitals, ranging from rural hospitals to tertiary paediatric and maternity hospitals within Australia.

**Patients:** Admitted neonates <28 days of age from participating hospitals.

**Main outcome measures:** Variation and appropriateness in prescribing for neonatal sepsis and variation in dosing for gentamicin and benzylpenicillin across hospitals.

**Results:** A total of 415 prescriptions among 214 neonates from 39 different hospitals were included. The majority of prescriptions: 342 (82.4%), were for neonates <7 days of age. The most commonly prescribed antibiotics were gentamicin and benzylpenicillin, with 323 (77.8%) prescriptions. Dosing variability was substantial, with doses ranging from 2mg/kg to 8mg/kg for gentamicin (median 5mg/kg, IQR 4-5mg/kg) and 45-72mg/kg for benzylpenicillin (median 60mg/kg, IQR 50-60) though only 13 (3.2%) and 19 (4.6%) of prescriptions were locally assessed as inappropriate or non-compliant with guidelines, respectively. At time of audit, 22% of antibiotics had been given for more than 48 hours and 9% more than 72 hours, though microbiologically confirmed infection was documented in only 9 neonates (4.2%).

**Conclusions:** Prescribing for neonatal sepsis was dominated by use of benzylpenicillin and gentamicin with substantial variation in dosing. A small minority had culture-confirmed infection. Efforts to standardise antibiotic dosing and duration for suspected neonatal sepsis are recommended.

## Introduction

The neonatal period is the most vulnerable time of life, with neonatal mortality accounting for almost 50% of deaths in children under 5 years and approximately 2.5 million deaths globally in the first month of life in 2018.<sup>1</sup> In Australia, despite a comparatively low neonatal mortality rate: 2 per 1000 live births compared with 18 per 1000, globally,<sup>1</sup> perinatal infection is identified as the primary cause of neonatal death in 10.6% of Australian neonatal deaths.<sup>2</sup> Risk factors for neonatal sepsis mortality include prematurity, lower postnatal age and immunologic immaturity.<sup>3,4</sup> Neonates who require hospitalisation may have additional risk factors for sepsis, including central venous catheters and mechanical ventilation. Clinical signs of neonatal sepsis are often non-specific,<sup>5</sup> thus empiric antibiotic therapy is commonly prescribed for hospitalized neonates.<sup>6</sup> The majority of neonates treated empirically for sepsis, however, do not have confirmed infection on final assessment.<sup>7,8</sup>

Unintended adverse consequences of widespread antibiotic use for neonates have been increasingly recognized, with calls for better understanding of sepsis epidemiology, and efforts to promote judicious prescribing.<sup>9</sup> The Kaiser Permanente Early Onset Sepsis Calculator is one tool used to predict risk of microbiologically-confirmed infection and reduce unnecessary investigations and antibiotic therapy with some success.<sup>10</sup> This only applies to neonates with early-onset sepsis, however, and similar tools for late-onset sepsis are lacking.

In recognition that epidemiology of sepsis in neonates varies with age, it is commonly divided into early-onset sepsis (EOS) and late-onset sepsis (LOS). While risk and microbiology of sepsis in the first few days of life is reported to be substantially influenced by antenatal and intrapartum factors, sepsis beyond the first few days is likely influenced to a greater extent by the post-natal environment, though the utility of this division across global

1  
2  
3 settings has been challenged.<sup>11</sup> The definition of EOS versus LOS also varies between  
4  
5 studies. The Australian and New Zealand Neonatal Network defines EOS as neonatal sepsis  
6  
7 with initial symptoms beginning <48 hours of life (2 days).<sup>12</sup> Common pathogens identified  
8  
9 in EOS have been better characterised than those causing LOS in Australia, though both have  
10  
11 been described in the United Kingdom.<sup>6,13</sup>  
12  
13

14  
15 In this study we aimed to report on antimicrobial prescribing for neonatal sepsis of all types,  
16  
17 using a national dataset from Australia. Antibiotic use and appropriateness for indications  
18  
19 other than sepsis, such as prophylaxis, are not included in this analysis.  
20  
21  
22  
23  
24  
25

## 26 Methods

27  
28 We obtained de-identified data from the NAPS database of point-prevalence prescribing  
29  
30 surveys for Australian hospitals from all 6 Australian states and 2 territories (1 January 2014  
31  
32 to 31 December 2018).<sup>14</sup> Participation in these surveys is voluntary and data are submitted  
33  
34 through a web-based interface to a central database.<sup>14</sup> Hospitals can participate in these  
35  
36 surveys whenever they choose though most participate annually. Survey methodology has  
37  
38 been described previously;<sup>15,16</sup> in brief, the dataset includes antimicrobial usage (agent, dose,  
39  
40 frequency, route); baseline demographics (age, gender, hospital location, funding type  
41  
42 [public/private], hospital size); infection site and type; adherence with local or national  
43  
44 Australian antibiotic guidelines; and antimicrobial appropriateness. Local guidelines include  
45  
46 any locally-endorsed hospital, network or regional guidelines, other than the nationally used  
47  
48 Therapeutic Guidelines.<sup>17</sup> Assessors can choose to select from various  
49  
50 potential reasons for inappropriate prescribing, including  
51  
52 "spectrum too broad", "spectrum too narrow", "incorrect  
53  
54 route", "incorrect dose or frequency", "incorrect duration",  
55  
56  
57  
58  
59  
60

1  
2  
3 "allergy mismatch" or "microbiology mismatch"; these are not  
4 mutually exclusive. Appropriateness assessments were conducted  
5 by trained local surveyors as described previously<sup>18,19</sup> A score  
6 of 1 or 2 is considered to be 'appropriate' and 3 or 4 as  
7 'inappropriate' (Appendix, Supplementary Figure 1). For this study,  
8 individual prescription data were extracted for patients surveyed aged 0 days to less than 28  
9 days of age where the indication group for antibiotic was recorded as "sepsis" and weight  
10 was recorded (to enable dose calculation). The principle unit of analysis was individual  
11 prescription. Dosing of gentamicin and benzylpenicillin was rounded  
12 to whole mg/kg. Year of survey was analysed by calendar year. We designated EOS  
13 by age criteria as sepsis indication for antibiotics with age <2 completed days. LOS was  
14 defined by age ≥2 days at antibiotic commencement or if age >7 days at audit date if  
15 antibiotic start date was missing. Prematurity was defined as gestational age <37 weeks.  
16 Dedicated children's hospitals, maternity hospitals or combined maternity/children's  
17 hospitals were classed as specialist hospitals.  
18  
19 Ethics approval as a quality assurance project was obtained from the Melbourne Health  
20 Human Research Ethics Committee to coordinate the NAPS (No. QA2013066).

### 21 **Patient involvement**

22 Patients were not involved in the design or analysis of this study.

### 23 **Statistical analysis**

24 Categorical variables and proportions were summarized and compared between groups using  
25 a Chi-squared test. A P value of 0.05 (two-tailed) was deemed statistically significant. Dosing  
26 variability in mg/kg and antibiotic duration by groups was compared using Wilcoxon rank-  
27  
28  
29  
30  
31  
32  
33  
34  
35  
36  
37  
38  
39  
40  
41  
42  
43  
44  
45  
46  
47  
48  
49  
50  
51  
52  
53  
54  
55  
56  
57  
58  
59  
60

1  
2  
3 sum tests. Statistical analyses and graphs were done using Stata 16.0 (StataCorp, College  
4 Station, TX, USA).  
5  
6  
7  
8  
9  
10

## 11 Results

### 12 Demographics

13  
14  
15  
16 Among 884 neonatal prescriptions between 1 January 2014 and 31 December 2018, 415  
17 prescriptions (46.9%) were recorded as given for sepsis. These prescriptions were for 214  
18 neonates from 39 hospitals. All Australian States and Territories were represented apart from  
19 the Northern Territory. Hospitals included specialist women's hospitals or paediatric  
20 hospitals with tertiary neonatal intensive care units, as well as general public and private  
21 hospitals. A large majority of included hospitals (88.7%) were in metropolitan areas. Female  
22 neonates accounted for 184 prescriptions (44.3%) and the rest were for males. The number of  
23 prescriptions varied by year (Table 1). The majority of prescriptions were for neonates <7  
24 days of age (342, 82.4%). Where this could be assessed, 71% of prescriptions (245/345) were  
25 for EOS and 29% (100/345) for LOS. Premature neonates accounted for 123 prescriptions  
26 (54.4% of prescriptions for which gestational age was available). The median weight was  
27 2.9kg (IQR 1.9-3.4). Demographic details are shown in full in Table 1.  
28  
29  
30  
31  
32  
33  
34  
35  
36  
37  
38  
39  
40  
41  
42  
43  
44  
45  
46  
47

### 48 Antibiotic type and Duration

49  
50 The Drug Utilization 90% (DU90): the number of antibiotics accounting for 90% of usage  
51 when ranked by frequency, included a total of 5 antibiotics. In descending order these were  
52 gentamicin, benzylpenicillin, cefotaxime, ampicillin and flucloxacillin. Twenty neonates  
53 (9.3%) were prescribed one antimicrobial for sepsis, 187 neonates (87.4%) 2 antimicrobials  
54 and 7 neonates (3.3%) 3 antimicrobials. There were 323 (77.8%) prescriptions of either  
55  
56  
57  
58  
59  
60

gentamicin or benzylpenicillin and 133/214 neonates (62.1%) were prescribed both benzylpenicillin and gentamicin. Antibiotics most frequently prescribed in total and for EOS/LOS are shown in Tables 2 and 3. At audit, 48% of antibiotics had been given for >24 hours, 22% for >48 hours and 9% for >72 hours (Figure 1). Microbiologically-confirmed infection was documented in only 15 prescriptions (3.6%) among 9 (4.2%) neonates (Table 4). Antibiotic duration was significantly longer in specialist hospitals (median 2 days, IQR 1-3 days) compared with non-specialist hospitals (median 1 day, IQR 1-1.5 days,  $P<0.0001$ ) (Appendix, Supplementary Figure 2) but did not differ by metropolitan versus rural hospital prescription.

### **Appropriateness and Guideline Compliance**

Overall 400/415 prescriptions (96.4%) were assessed by local hospital auditors as appropriate and 13 (3.1%) inappropriate; with 330 prescriptions (79.5%) assessed as compliant with local guidelines and 53 prescriptions (12.8%) as compliant with national *Therapeutic Guidelines*.<sup>20</sup> Nineteen prescriptions (4.6%) were assessed as non-compliant with guidelines. Detailed appropriateness and compliance assessment is displayed in Appendix, Supplementary Table 1. Appropriateness was reported as similar for specialist and non-specialist hospitals (98% vs 95% appropriate) but reported guideline compliance was significantly higher in specialist hospitals (97.3% compared with 91.8%, respectively,  $P=0.013$ ). Metropolitan hospitals had higher reported appropriateness compared with rural hospitals (98.1% vs 87.2%,  $P=0.0001$ ) and guideline compliance (96.9% vs 83%,  $P<0.0001$ ).

### **Dosing variability – gentamicin and benzylpenicillin**

Gentamicin dosing and frequency information was available for 178 prescriptions. The dose varied from 2-8mg/kg (median 5mg/kg, IQR 4-5mg/kg). Gentamicin dose variability is

1  
2  
3 shown in Figure 2a. Benzylpenicillin dosing and frequency information was available for 143  
4 prescriptions. The dose varied 45-72mg/kg (median 60mg/kg, IQR 50-60) and  
5  
6 benzylpenicillin dose variability is shown in Figure 2b. Dosing frequency also varied, though  
7  
8 the majority of neonates received 24-hourly gentamicin and 12-hourly benzylpenicillin  
9  
10 (Appendix, Supplementary Table 2). Dosing for benzylpenicillin did not differ  
11  
12 by hospital location (metropolitan versus rural), or by specialist/non-specialist hospital.  
13  
14 Gentamicin dosing was significantly lower ( $P<0.0001$ ) in non-specialist hospitals (median  
15  
16 4.4 mg/kg/dose, IQR 3.9-5 mg/kg/dose) compared with specialist hospitals (median 5  
17  
18 mg/kg/dose, IQR 4.6-5.1 mg/kg/dose). Gentamicin dosing was also significantly lower  
19  
20 ( $P<0.0001$ ) in rural hospitals (median 3.9 mg/kg/dose, IQR 2.5-4.5 mg/kg/dose) compared  
21  
22 with metropolitan hospitals (median 5 mg/kg/dose, IQR 4.5-5 mg/kg/dose).  
23  
24  
25  
26  
27  
28  
29

## 30 Discussion

31  
32  
33  
34  
35 In this study, the largest nationwide analysis of prescribing for neonatal sepsis in Australia,  
36  
37 we found a strong preference for use of gentamicin and benzylpenicillin for treatment of  
38  
39 neonatal sepsis/risk of sepsis but substantial variation in dosing of these agents. The study  
40  
41 included a broad range of gestational ages and a variety of hospital types across Australia, but  
42  
43 most neonates treated for sepsis were <7 days of age. Only 4% of neonates had  
44  
45 microbiologically confirmed infection. Locally-assessed appropriateness and guideline  
46  
47 compliance were high but varied by hospital type and location.  
48  
49  
50

51  
52 Large-scale analysis of antibiotic prescribing and appropriateness for neonatal sepsis has not  
53  
54 been reported in Australia. Information on neonatal empiric guideline use<sup>21</sup> and prescribing<sup>22</sup>  
55  
56 has been reported from selected large neonatal intensive care units but this excludes many  
57  
58 health services providing neonatal care. Hospitals use a variety of different guidelines for  
59  
60



1  
2  
3 selection and dosing of empiric antibiotic therapy in neonates.<sup>21-24</sup> Benzylpenicillin and  
4 gentamicin are recommended for empiric treatment of neonatal sepsis in current national  
5 guidelines<sup>20</sup> and are appropriate empiric therapy for the majority of organisms responsible for  
6 EOS in Australia.<sup>6</sup> This study confirms these are frequently used currently, though with  
7 considerable variation in administration.  
8  
9

10  
11  
12  
13  
14  
15 In our study, only a small number of sepsis prescriptions (4%) were for microbiologically  
16 confirmed infections. While antibiotics may be life-saving, they are also associated with  
17 adverse effects, including impact on the neonate microbiome,<sup>25</sup> with potential long-term  
18 atopic and metabolic consequences of antibiotics in early life including asthma<sup>26</sup> and  
19 obesity.<sup>27</sup> A rational prescribing approach includes “making a (differential) diagnosis,  
20 estimating prognosis, establishing the goals of therapy, selecting the most appropriate  
21 treatment and monitoring the effects of that treatment”.<sup>28</sup> In contrast, prescribing for risk of  
22 sepsis in neonates generally requires commencement of antibiotic therapy, despite the fact  
23 that most will not have culture-confirmed infection. Current challenges in refining and  
24 standardizing therapy include a lack of data-driven consensus definition for neonatal sepsis  
25 and lack of sufficiently rapid, sensitive and specific diagnostic tests during the early phase of  
26 illness to rule in/out serious infection.<sup>29</sup> More sensitive and specific rapid diagnostic tools,  
27 requiring minimal sample volumes are required to further improve care and outcomes for  
28 suspected neonatal sepsis.  
29  
30  
31  
32  
33  
34  
35  
36  
37  
38  
39  
40  
41  
42  
43  
44  
45  
46  
47

48 Dosing variation in the small number of drugs commonly used to treat neonatal sepsis  
49 represents an opportunity to standardize and potentially improve care. A survey of 6  
50 Australian tertiary neonatal units conducted in 2012 demonstrated substantial variation in  
51 dosing for vancomycin and gentamicin in neonates, with gentamicin, benzylpenicillin and  
52 vancomycin the most commonly prescribed drugs for systemic therapy.<sup>22</sup> A survey of  
53 NICUs from 21 European countries, with 586 systemic antibiotic prescriptions for infants up  
54  
55  
56  
57  
58  
59  
60

1  
2  
3 to 90 days of age, reported a tendency to over-dosing of penicillins and under-dosing of  
4  
5 vancomycin and gentamicin, relative to guidelines.<sup>30</sup> Although we found variation both above  
6  
7 and below recommended doses for benzylpenicillin and gentamicin in neonates treated for  
8  
9 sepsis, we also found a tendency to underdosing of gentamicin in non-specialist and non-  
10  
11 metropolitan hospitals, a cause for concern. One potential source of dosing variation is use of  
12  
13 birth weight rather than measured weight in neonates and rounding of doses for drug dose  
14  
15 calculations. In one study of more than 9000 neonates over a 20-year period, weight error due  
16  
17 to digit bias (whereby round numbers are favoured) improved over 20 years but was still  
18  
19 evident in neonates between 1000 and 4500 grams at  $\leq 5\%$ .<sup>31</sup> Relative to body size, this  
20  
21 phenomenon accounts for additional variation not seen in the adult population, where  
22  
23 standardized doses are used, and the implications of this variation for research and practice  
24  
25 improvement remain insufficiently understood.  
26  
27  
28  
29

30  
31 Although local and international guidelines available for management of neonatal sepsis are  
32  
33 available,<sup>32</sup> national guidelines for neonatal sepsis prescribing did not exist during the period  
34  
35 of this study. These are now available, however, with national *Therapeutic Guidelines*<sup>20</sup>  
36  
37 updated in mid-2019 to include recommendations for treatment of neonatal sepsis and  
38  
39 selected other neonatal infections. These subscription guidelines are widely available in  
40  
41 Australian hospitals and contain evidence-based dosing recommendations, selected by expert  
42  
43 consensus group review and dosing aligned with recommendations from the Australasian  
44  
45 Neonatal Medicines Formulary (ANMF) group. The ANMF group provides freely available,  
46  
47 evidence-based and regularly updated medicine guidelines for neonates.<sup>33</sup> Both the  
48  
49 Australasian Neonatal Medicines Formulary (ANMF)<sup>33</sup> and *Therapeutic Guidelines*<sup>20</sup>  
50  
51 recommend dosing of 5mg/kg for gentamicin and 60mg/kg for benzylpenicillin (90mg/kg for  
52  
53 meningitis), with frequency dependent on gestational and postnatal age. These may serve as  
54  
55  
56  
57  
58  
59  
60

1  
2  
3 references for future assessment of neonatal sepsis prescribing as national standard  
4  
5 recommendations.  
6  
7

8 Over 20% of antibiotics had been prescribed for >48 hours at time of audit, though only 4%  
9  
10 of neonates had microbiologically confirmed infection documented. Given that the majority  
11  
12 of potential pathogens in neonatal sepsis are identified within 36-48 hours,<sup>34</sup> this may  
13  
14 represent excessive antibiotic therapy and provides an opportunity for quality improvement.  
15  
16 Hospital antimicrobial stewardship teams may not include neonatal pharmacologists or  
17  
18 neonatal infection specialists and thus the recently nationally available guidelines for sepsis  
19  
20 and antimicrobial use in neonates, listed above, may provide a more robust framework for  
21  
22 assessment and promotion of the most appropriate therapy. Since most prescribing for  
23  
24 neonatal sepsis in Australia includes only a small number of drugs, as we have shown, efforts  
25  
26 to improve consistency of prescribing, particularly with regard to dosing in sepsis therapy,  
27  
28 should be possible.  
29  
30  
31  
32  
33

34 Over 95% of therapy for neonatal sepsis was deemed appropriate by local assessors and over  
35  
36 90% deemed compliant with guidelines in this study. This is similar to a previous Australian  
37  
38 study in which only 4% of prescriptions were considered inappropriate.<sup>22</sup> Compliance was  
39  
40 also deemed high in this study, largely based on compliance with local guidelines. Although  
41  
42 12.8% of prescriptions were reported as compliant with *Therapeutic Guidelines*, these  
43  
44 specifically excluded recommendations for neonates at the time of this study. Given the  
45  
46 substantial dosing variation and potentially excessive durations described above, these  
47  
48 findings suggest challenges with local assessment of appropriateness and guideline  
49  
50 compliance of therapy for sepsis in neonates. It is difficult to say whether the degree of  
51  
52 variation in prescribing demonstrated here led to suboptimal outcomes. Nonetheless, we  
53  
54 question whether such diversity in dosing for a handful of well-known drugs can be said to be  
55  
56 optimal therapy.  
57  
58  
59  
60

1  
2  
3 In this study we were unable to compare prescribing with local guidelines used within each  
4 hospital, and this is a substantial limitation, though it reinforces our point that diversity of  
5 guidelines is a major challenge to achieving standardized prescribing. In addition to this, as  
6 we have described above, it is possible that compliance and appropriateness have been over-  
7 attributed by local assessors, though this may in future be ameliorated by new national  
8 guidelines and further assessor training. We also do not currently have information on the  
9 proportion of neonates in each hospital who were not prescribed antibiotics. Weight was not a  
10 mandatory field in the NAPS tool at time of survey and we did not include neonates who did  
11 not have a weight recorded, as we required this to calculate doses by weight for this study.  
12 For future surveys, mandatory inclusion of weight could improve the tool's utility for  
13 antimicrobial prescribing to neonates and children. Gestational age was not stated in 45.5%  
14 of cases and this also limits our ability to interpret prescribing patterns and appropriateness  
15 with reference to this. We also made assumptions based on age to calculate EOS and LOS as  
16 this was not directly entered by local assessors, and these results must be interpreted with  
17 caution. The data here may not be applicable to countries with high rates of drug-resistant  
18 organisms causing neonatal sepsis<sup>11,35</sup> as these are likely to have different prescribing  
19 choices. In this study, we did not have access to local antibiograms but the proportions of  
20 gentamicin and penicillin used here is in keeping with available national data showing  
21 relatively low rates of drug-resistant pathogens in neonatal sepsis.<sup>36</sup>

## 22 Conclusions

23  
24 In this nationwide survey we have identified substantial variability in dosing of  
25 benzylpenicillin and gentamicin, the two most commonly prescribed antibiotics for neonatal  
26 sepsis in this study. Only a small minority of neonates treated for sepsis have culture-  
27 confirmed infection. Efforts to optimise therapy for treatment of neonatal sepsis and reach

1  
2  
3 consensus for therapy, including understanding prescribing practices and implementing  
4  
5 national guidelines, are recommended.  
6  
7  
8  
9

## 10 Acknowledgements

11  
12 We acknowledge the support of the Australian Commission for Safety and Quality in Health  
13  
14 Care, the NAPS staff and program and NAPS assessors and participating hospitals.  
15  
16  
17  
18  
19  
20

## 21 Funding

22 This work was supported by a PhD scholarship from the University of Melbourne for BM.  
23  
24 Since 2013 the Australian Commission on Safety and Quality in Health Care have supported  
25  
26 the NAPS program for the AURA Surveillance System. CCB is supported by a NHMRC  
27  
28 Career Development Fellowship (APP1111596). There was no direct funding for the  
29  
30 preparation or revision of this manuscript. NS is supported by a PhD scholarship from the  
31  
32 Australian Commonwealth Government.  
33  
34  
35  
36  
37  
38  
39

## 40 Transparency Declaration

41 All authors declare that they have no competing interests, financial or otherwise.  
42  
43  
44  
45

## 46 Contributorship statement

47 BM planned and conducted the study, reviewed the data and co-wrote the manuscript,  
48  
49 submitted the study and is responsible for overall content. CC reviewed the data and co-wrote  
50  
51 the manuscript. NS planned the study, reviewed the data and co-wrote the manuscript. RJ  
52  
53 reviewed the data and co-wrote the manuscript. CJ reviewed the data and co-wrote the  
54  
55 manuscript. PK reviewed the data and co-wrote the manuscript. CB reviewed the data and co-  
56  
57 wrote the manuscript. KT planned the study, reviewed the data and co-wrote the manuscript.  
58  
59  
60

1  
2  
3  
4  
5  
6  
7  
8  
9  
10  
11  
12  
13  
14  
15  
16  
17  
18  
19  
20  
21  
22  
23  
24  
25  
26  
27  
28  
29  
30  
31  
32  
33  
34  
35  
36  
37  
38  
39  
40  
41  
42  
43  
44  
45  
46  
47  
48  
49  
50  
51  
52  
53  
54  
55  
56  
57  
58  
59  
60

Confidential: For Review Only

## What is already known on this topic

(a maximum of 3 brief statements (no more than 25 words per statement))

- Neonatal sepsis is an important cause of morbidity and mortality globally
- There is considerable uncertainty about antibiotic prescribing and optimal regimens to treat neonatal sepsis
- Current challenges include lack of epidemiological data to inform prescribing improvements

## What this study adds

(a maximum of 3 brief statements (no more than 25 words per statement))

- Benzylpenicillin and gentamicin accounted for more than three quarters of antibiotics prescribed for sepsis among Australian neonates, only 4% of whom had microbiologically confirmed infection.
- There was considerable variation in dosing for both benzylpenicillin and gentamicin
- There is an opportunity to improve prescribing and reduce unnecessary variation by targeting a small number of drugs in the treatment of neonatal sepsis

## References

1. UNIGME. Levels & Trends in Child Mortality: Report 2019. 2019. <https://childmortality.org/reports>. Accessed 13/11/2019.
2. AIHW. Australian Institute of Health and Welfare 2019. Stillbirths and neonatal deaths in Australia 2015 and 2016: in brief. Perinatal statistics series no. 36. Cat. no. PER 102. In. Canberra: AIHW; 2019.
3. Raymond SL, Stortz JA, Mira JC, Larson SD, Wynn JL, Moldawer LL. Immunological Defects in Neonatal Sepsis and Potential Therapeutic Approaches. *Frontiers in Pediatrics*. 2017;5(14).
4. Ghazal P, Dickinson P, Smith CL. Early life response to infection. *Current opinion in infectious diseases*. 2013;26(3):213-218.
5. Gerdes JS. Diagnosis and management of bacterial infections in the neonate. *Pediatric Clinics*. 2004;51(4):939-959.
6. Singh T, Barnes EH, Isaacs D. Early-onset neonatal infections in Australia and New Zealand, 2002–2012. *Archives of Disease in Childhood-Fetal and Neonatal Edition*. 2019;104(3):F248-F252.
7. Fjalstad JW, Stensvold HJ, Bergseng H, et al. Early-onset sepsis and antibiotic exposure in term infants: a nationwide population-based study in Norway. *The Pediatric infectious disease journal*. 2016;35(1):1-6.
8. Schulman J, Profit J, Lee HC, et al. Variations in neonatal antibiotic use. *Pediatrics*. 2018;142(3):e20180115.
9. Lavoie PM, Popescu CR, Molyneux EM, et al. Rethinking management of neonates at risk of sepsis. *The Lancet*. 2019;394(10195):279-281.
10. Strunk T, Buchiboyina A, Sharp M, Nathan E, Doherty D, Patole S. Implementation of the Neonatal Sepsis Calculator in an Australian Tertiary Perinatal Centre. *Neonatology*. 2018;113(4):379-382.
11. Chaurasia S, Sivanandan S, Agarwal R, Ellis S, Sharland M, Sankar MJ. Neonatal sepsis in South Asia: huge burden and spiralling antimicrobial resistance. *BMJ*. 2019;364:k5314.
12. Chow SSW, Creighton, P., Chambers, G.M., Lui, K. *Report of the Australian and New Zealand Neonatal Network 2017*. Sydney2019.
13. Cailles B, Kortsalioudaki C, Buttery J, et al. Epidemiology of UK neonatal infections: the neonIN infection surveillance network. *Archives of Disease in Childhood-Fetal and Neonatal Edition*. 2018;103(6):F547-F553.
14. National Centre for Antimicrobial Stewardship and Australian Commission on Safety and Quality in Health Care. Antimicrobial Prescribing Practice in Australian Hospitals: Results of the 2016 Hospital National Antimicrobial Prescribing Survey. In. Sydney: ACSQHC; 2018.
15. National Centre for Antimicrobial Stewardship and Australian Commission on Safety and Quality in Health Care. Antimicrobial prescribing practice in Australian hospitals: results of the 2017 Hospital National Antimicrobial Prescribing Survey. In. Sydney: ACSQHC; 2018.



16. McMullan BJ, Hall L, James R, et al. Antibiotic appropriateness and guideline adherence in hospitalized children: results of a nationwide study. *Journal of Antimicrobial Chemotherapy*. 2019.
17. Therapeutic Guidelines Ltd, Therapeutic Guidelines: antibiotic, version 15; Melbourne 2015: <https://www.tg.org.au/>.
18. Spiotta AM, James RF, Lowe SR, et al. Balloon-augmented Onyx embolization of cerebral arteriovenous malformations using a dual-lumen balloon: a multicenter experience. *J Neurointerv Surg*. 2015;7(10):721-727.
19. Constantinescu IC, Popa OP, Popa LO, Cobzaru I, B MDK, Adam C. A new feather mite species of the genus *Trouessartia* Canestrini, 1899 (Acarina, Trouessartiidae) - an integrative description (morphology and DNA barcoding data). *Zookeys*. 2018(789):19-35.
20. Therapeutic Guidelines Ltd, Therapeutic Guidelines: antibiotic, version 16; Melbourne 2019: <https://www.tg.org.au/>.
21. Carr JP, Burgner DP, Hardikar RS, Buttery JP. Empiric antibiotic regimens for neonatal sepsis in Australian and New Zealand neonatal intensive care units. *J Paediatr Child Health*. 2017;53(7):680-684.
22. Osowicki J, Gwee A, Noronha J, et al. Australia-wide point prevalence survey of antimicrobial prescribing in neonatal units: how much and how good? *The Pediatric infectious disease journal*. 2015;34(8):e185-e190.
23. Leroux S, Zhao W, Bétrémieux P, Pladys P, Saliba E, Jacqz-Aigrain E. Therapeutic guidelines for prescribing antibiotics in neonates should be evidence-based: a French national survey. *Archives of disease in childhood*. 2015;100(4):394-398.
24. Liem TBY, Krediet TG, Fler A, Egberts TCG, Rademaker CMA. Variation in antibiotic use in neonatal intensive care units in the Netherlands. *Journal of Antimicrobial Chemotherapy*. 2010;65(6):1270-1275.
25. Cotten CM. Adverse consequences of neonatal antibiotic exposure. *Curr Opin Pediatr*. 2016;28(2):141-149.
26. Droste JHJ, Wieringa MH, Weyler JJ, Nelen VJ, Vermeire PA, Van Bever HP. Does the use of antibiotics in early childhood increase the risk of asthma and allergic disease? *Clinical & Experimental Allergy*. 2000;30(11):1548-1553.
27. Cox LM, Blaser MJ. Antibiotics in early life and obesity. *Nature Reviews Endocrinology*. 2015;11(3):182.
28. Maxwell SR. Rational prescribing: the principles of drug selection. *Clin Med (Lond)*. 2016;16(5):459-464.
29. Vergnano S, Seale AC, Fitchett EJ, Sharland M, Heath PT. Serious bacterial infections in neonates: improving reporting and case definitions. *International health*. 2017;9(3):148-155.
30. Metsvaht T, Nellis G, Varendi H, et al. High variability in the dosing of commonly used antibiotics revealed by a Europe-wide point prevalence study: implications for research and dissemination. *BMC pediatrics*. 2015;15(1):41.
31. Emmerson AJ, Roberts SA. Rounding of birth weights in a neonatal intensive care unit over 20 years: an analysis of a large cohort study. *BMJ open*. 2013;3(12):e003650-e003650.
32. Liem TBY, Slob EMA, Termote JUM, Wolfs TFW, Egberts ACG, Rademaker CMA. Comparison of antibiotic dosing recommendations for neonatal sepsis from

- 1  
2  
3 established reference sources. *International journal of clinical pharmacy*.  
4 2018;40(2):436-443.  
5  
6 33. Bolisetty S. Australasian Neonatal Medicines Formulary (ANMF).  
7 [https://www.seslhd.health.nsw.gov.au/royal-hospital-for-women/australasian-  
9 neonatal-medicines-formulary-anmf](https://www.seslhd.health.nsw.gov.au/royal-hospital-for-women/australasian-<br/>8 neonatal-medicines-formulary-anmf). Published 2019. Accessed 10 July 2019, 2019.  
10  
11 34. Klingenberg C, Kornelisse RF, Buonocore G, Maier RF, Stocker M. Culture-Negative  
12 Early-Onset Neonatal Sepsis - At the Crossroad Between Efficient Sepsis Care and  
13 Antimicrobial Stewardship. *Frontiers in pediatrics*. 2018;6:285-285.  
14  
15 35. Folgari L, Ellis SJ, Bielicki JA, Heath PT, Sharland M, Balasegaram M. Tackling  
16 antimicrobial resistance in neonatal sepsis. *The Lancet Global Health*.  
17 2017;5(11):e1066-e1068.  
18  
19 36. ACSQHC. AURA 2017: second Australian report on antimicrobial use and resistance  
20 in human health. In. Sydney: Australian Commission on Safety and Quality in Health  
21 Care; 2017.  
22  
23  
24  
25  
26  
27  
28  
29  
30  
31  
32  
33  
34  
35  
36  
37  
38  
39  
40  
41  
42  
43  
44  
45  
46  
47  
48  
49  
50  
51  
52  
53  
54  
55  
56  
57  
58  
59  
60

## Figures and Tables

Table 1: Demographic Details

| DEMOGRAPHIC                       | Total prescriptions<br>(415) | (%)   |
|-----------------------------------|------------------------------|-------|
| <b>Gestational age</b>            |                              |       |
| <25 weeks                         | 20                           | 4.8%  |
| 25-<30 weeks                      | 32                           | 7.7%  |
| 30-<35 weeks                      | 52                           | 12.5% |
| 35-<37 weeks                      | 21                           | 5.1%  |
| >=37 weeks                        | 101                          | 24.3% |
| (not stated)                      | 189                          | 45.5% |
| <b>Postnatal age</b>              |                              |       |
| <7 days                           | 342                          | 82.4% |
| 7-<15 days                        | 38                           | 9.2%  |
| 15-<28 days                       | 35                           | 8.4%  |
| <b>Sex: Female</b>                | 184                          | 44.3% |
| <b>Median weight in kg (IQR)</b>  | 2.9 (1.9-3.4)                | NA    |
| <b>Records by year of survey</b>  |                              |       |
| 2014                              | 56                           | 13.5% |
| 2015                              | 118                          | 28.4% |
| 2016                              | 63                           | 15.2% |
| 2017                              | 87                           | 21.0% |
| 2018                              | 91                           | 21.9% |
| <b>In NICU/ICU*</b>               | 174                          | 41.8% |
| <b>Hospital Type</b>              |                              |       |
| Specialist Women's                | 161                          | 38.8% |
| Specialist Children's             | 76                           | 18.3% |
| Specialist Women's and Children's | 31                           | 7.5%  |
| Other Public Hospitals            | 134                          | 32.2% |
| Private Hospitals                 | 6                            | 1.5%  |
| Unpeered/unknown                  | 7                            | 1.7%  |
| <b>Hospital Location</b>          |                              |       |
| Major city                        | 368                          | 88.7% |
| Inner regional                    | 28                           | 6.7%  |
| Outer regional                    | 19                           | 4.6%  |

\*NICU/ICU status not stated for 77 prescriptions

Table 2: Antibiotics by Frequency Prescribed

| Antibiotic                             | Prescriptions* | Percentage | Cumulative Percentage |
|----------------------------------------|----------------|------------|-----------------------|
| <b>Gentamicin</b>                      | 179            | 43.1       | 43.1                  |
| <b>Benzylpenicillin (Penicillin G)</b> | 144            | 34.7       | 77.8                  |
| <b>Cefotaxime</b>                      | 26             | 6.3        | 84.1                  |
| <b>Ampicillin</b>                      | 18             | 4.3        | 88.4                  |
| <b>Flucloxacillin</b>                  | 13             | 3.1        | 91.6                  |
| <b>Vancomycin</b>                      | 13             | 3.1        | 94.7                  |
| <b>Amoxicillin (Amoxycillin)</b>       | 9              | 2.2        | 96.9                  |
| <b>Meropenem</b>                       | 6              | 1.45       | 98.3                  |
| <b>Benzathine penicillin</b>           | 4              | 0.96       | 99.3                  |
| <b>Amphotericin B liposomal</b>        | 1              | 0.24       | 99.5                  |
| <b>Azithromycin</b>                    | 1              | 0.24       | 99.8                  |
| <b>Ceftriaxone</b>                     | 1              | 0.24       | 100                   |

\*Total=415 prescriptions in 214 neonates

Table 3: Top 5 Antibiotics by Frequency Prescribed and Sepsis Type

| <b>Antibiotic: All</b>          | <b>Prescriptions<br/>Total 415 n (%)</b> | <b>Cumulative<br/>Percentage</b> |
|---------------------------------|------------------------------------------|----------------------------------|
| Gentamicin                      | 179 (43.1)                               | 43.1                             |
| Benzylpenicillin (Penicillin G) | 144 (34.7)                               | 77.8                             |
| Cefotaxime                      | 26 (6.3)                                 | 84.1                             |
| Ampicillin                      | 18 (4.3)                                 | 88.4                             |
| Flucloxacillin                  | 13 (3.1)                                 | 91.6                             |
|                                 |                                          |                                  |
| <b>Antibiotic: EOS*</b>         | <b>Prescriptions<br/>Total 245 n (%)</b> | <b>Cumulative<br/>Percentage</b> |
| Gentamicin                      | 119 (48.6)                               | 48.6                             |
| Benzylpenicillin (Penicillin G) | 100 (40.8)                               | 89.4                             |
| Ampicillin                      | 12 (4.9)                                 | 94.3                             |
| Amoxicillin                     | 5 (2)                                    | 96.3                             |
| Benzathine penicillin           | 3 (1.2)                                  | 97.6                             |
|                                 |                                          |                                  |
| <b>Antibiotic: LOS*</b>         | <b>Prescriptions<br/>Total 100 n (%)</b> | <b>Cumulative<br/>Percentage</b> |
| Gentamicin                      | 31 (31)                                  | 31                               |
| Cefotaxime                      | 18 (18)                                  | 49                               |
| Benzylpenicillin (Penicillin G) | 16 (16)                                  | 65                               |
| Vancomycin                      | 11 (11)                                  | 76                               |
| Flucloxacillin                  | 10 (10)                                  | 86                               |

\*EOS=early-onset sepsis; LOS=late-onset sepsis

Table 4: Neonates with microbiologically confirmed infection

| Microbiologically confirmed infection-type    | Prescriptions(%) | Neonates(%) |
|-----------------------------------------------|------------------|-------------|
| Coagulase-negative staphylococcal bacteraemia | 7 (1.7)          | 5 (2.3)     |
| Candidaemia*                                  | 4 (1.0)          | 2 (0.9)     |
| Other**                                       | 4 (1.0)          | 2 (0.9)     |
| Total***                                      | 15 (3.6)         | 9 (4.2)     |

\*One infant had *Candida glabrata* and coagulase-negative *Staphylococcus* in blood cultures and was treated with liposomal Amphotericin B. The other had *Candida albicans* in blood culture. This infant was treated with fluconazole for indication “candidaemia” and benzylpenicillin and cefotaxime for indication “sepsis”.

\*\*One infant had gram-positive cocci detected in blood culture, awaiting species confirmation at time of audit, the other had pneumonia with *Klebsiella oxytoca* isolated from endotracheal tube aspirate culture

\*\*\*Only one infant with microbiologically confirmed infection met criteria for EOS, with as yet unidentified gram-positive cocci in blood culture.

Figure 1: Duration of therapy (completed antibiotic days at audit date)

Figure 2: Individual dose ranges for gentamicin and benzylpenicillin (whole mg/kg)

\*2a, Gentamicin (n=178) Median gentamicin dose 5mg/kg, IQR 4-5mg/kg, dots represent outliers; one 52mg/kg dose omitted from table, as apparent 10-fold error

\*2b, Benzylpenicillin (n=143) Median benzylpenicillin dose 60mg/kg, IQR 50-60; one 6mg/kg dose omitted from figure, as apparent 10-fold error

1  
2  
3  
4  
5  
6  
7  
8  
9  
10  
11  
12  
13  
14  
15  
16  
17  
18  
19  
20  
21  
22  
23  
24  
25  
26  
27  
28  
29  
30  
31  
32  
33  
34  
35  
36  
37  
38  
39  
40  
41  
42  
43  
44  
45  
46  
47  
48  
49  
50  
51  
52  
53  
54  
55  
56  
57  
58  
59  
60



1  
2  
3  
4  
5  
6  
7  
8  
9  
10  
11  
12  
13  
14  
15  
16  
17  
18  
19  
20  
21  
22  
23  
24  
25  
26  
27  
28  
29  
30  
31  
32  
33  
34  
35  
36  
37  
38  
39  
40  
41  
42  
43  
44  
45  
46  
47  
48  
49  
50  
51  
52  
53  
54  
55  
56  
57  
58  
59  
60

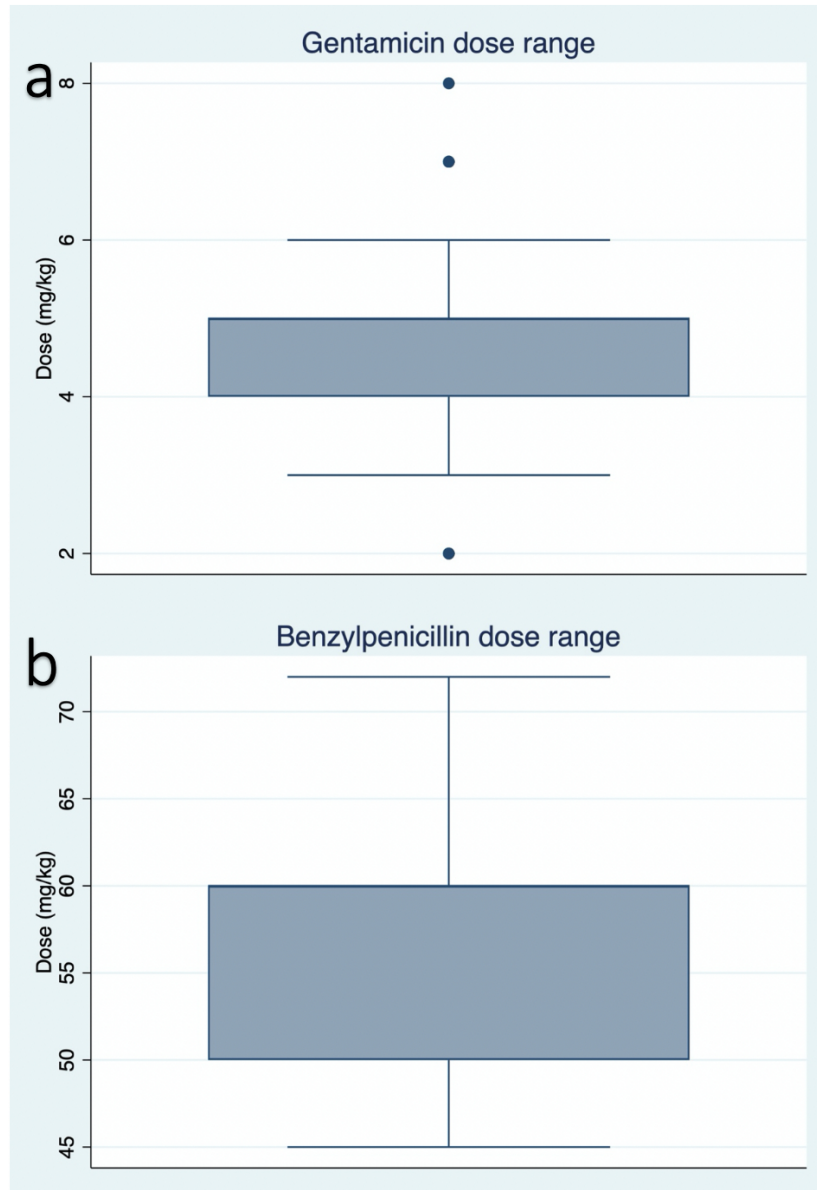



## Appendix: Supplementary Material

HOSPITAL  
INAPS  
National Antimicrobial  
Prescribing Survey

## Appropriateness definitions

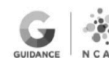

|               |                           | If endorsed guidelines are <u>present</u>                                                                                                                                                                                                                                                                                                                                                                                                                                                                                                                                   | If endorsed guidelines are <u>absent</u>                                                                                                                                                                                                                                                                                                                                 |
|---------------|---------------------------|-----------------------------------------------------------------------------------------------------------------------------------------------------------------------------------------------------------------------------------------------------------------------------------------------------------------------------------------------------------------------------------------------------------------------------------------------------------------------------------------------------------------------------------------------------------------------------|--------------------------------------------------------------------------------------------------------------------------------------------------------------------------------------------------------------------------------------------------------------------------------------------------------------------------------------------------------------------------|
| Appropriate   | 1<br>Optimal <sup>1</sup> | Antimicrobial prescription follows either the Therapeutic Guidelines <sup>2</sup> or endorsed local guidelines <i>optimally</i> , including antimicrobial choice, dosage, route and duration <sup>3</sup>                                                                                                                                                                                                                                                                                                                                                                   | The antimicrobial prescription has been reviewed and endorsed by an infectious diseases clinician or a clinical microbiologist<br><b>OR</b><br>The prescribed antimicrobial will cover the likely causative or cultured pathogens <b>and</b> there is not a narrower spectrum or more appropriate antimicrobial choice, dosage, route or duration <sup>3</sup> available |
|               | 2<br>Adequate             | Antimicrobial prescription does not optimally follow the Therapeutic Guidelines <sup>2</sup> or endorsed local guidelines, including antimicrobial choice, dosage, route or duration <sup>3</sup> , however, is a <b>reasonable</b> alternative choice for the likely causative or cultured pathogens<br><b>OR</b><br>For surgical prophylaxis, as above <b>and</b> duration <sup>3</sup> is less than 24 hours                                                                                                                                                             | Antimicrobial prescription including antimicrobial choice, dosage, route and duration <sup>3</sup> is not the most optimal, however, is a <b>reasonable</b> alternative choice for the likely causative or cultured pathogens<br><b>OR</b><br>For surgical prophylaxis, as above <b>and</b> duration <sup>3</sup> is less than 24 hours                                  |
| Inappropriate | 3<br>Suboptimal           | There may be a mild or non-life-threatening allergy mismatch<br><b>OR</b><br>Antimicrobial prescription including antimicrobial choice, dosage, route and duration <sup>3</sup> , is an <b>unreasonable</b> choice for the likely causative or cultured pathogens, including: <ul style="list-style-type: none"> <li>spectrum excessively broad, unnecessary overlap in spectrum of activity, dosage excessively high or duration excessively long</li> <li>failure to appropriately de-escalate with microbiological results</li> </ul>                                    |                                                                                                                                                                                                                                                                                                                                                                          |
|               | 4<br>Inadequate           | Antimicrobial prescription including antimicrobial choice, dosage, route or duration <sup>3</sup> is <b>unlikely</b> to treat the likely causative or cultured pathogens<br><b>OR</b><br>The documented or presumed indication does not require <b>any</b> antimicrobial treatment<br><b>OR</b><br>There may be a severe or possibly life-threatening allergy mismatch, or the potential risk of toxicity due to drug interaction<br><b>OR</b><br>For surgical prophylaxis, the duration <sup>3</sup> is greater than 24 hours (except where local guidelines endorse this) |                                                                                                                                                                                                                                                                                                                                                                          |
|               | 5<br>Not assessable       | The indication is not documented and unable to be determined from the notes<br><b>OR</b><br>The notes are not comprehensive enough to assess appropriateness<br><b>OR</b><br>The patient is too complex, due to multiple co-morbidities, allergies or microbiology results, etc.                                                                                                                                                                                                                                                                                            |                                                                                                                                                                                                                                                                                                                                                                          |

<sup>1</sup> Taking into account acceptable changes due to the patient's weight or renal function, if this information is available

<sup>2</sup> Antibiotic Expert Group. Therapeutic Guidelines: Antibiotic. Version 15 (2014), or online version

<sup>3</sup> Duration should only be assessed if the guidelines state a recommended duration and the antimicrobial has already been dispensed for longer than this, or if there is a clear planned 'end date' documented

## Supplementary Figure 1: Definitions of appropriate prescribing

Supplementary Table 1: Antibiotic Appropriateness and Compliance with Guidelines

| <b>Appropriateness*</b>                      | <b>Frequency**</b> | <b>Percentage</b> |
|----------------------------------------------|--------------------|-------------------|
| 1-Optimal                                    | 373                | 89.9              |
| 2-Adequate                                   | 27                 | 6.5               |
| 3-Suboptimal                                 | 11                 | 2.7               |
| 4-Inadequate                                 | 2                  | 0.5               |
| 5-Not Assessable                             | 2                  | 0.5               |
|                                              |                    |                   |
| <b>Compliance with Guidelines*</b>           | <b>Frequency**</b> | <b>Percentage</b> |
| Compliant with locally endorsed guidelines   | 330                | 79.5              |
| Compliant with <i>Therapeutic Guidelines</i> | 53                 | 12.8              |
| Non-compliant with guidelines                | 19                 | 4.6               |
| Directed therapy                             | 7                  | 1.7               |
| No guidelines available                      | 4                  | 1                 |
| Not assessable                               | 2                  | 0.5               |

\*These are as assessed by trained local auditors and categories are mutually exclusive

\*\*N=415 prescriptions

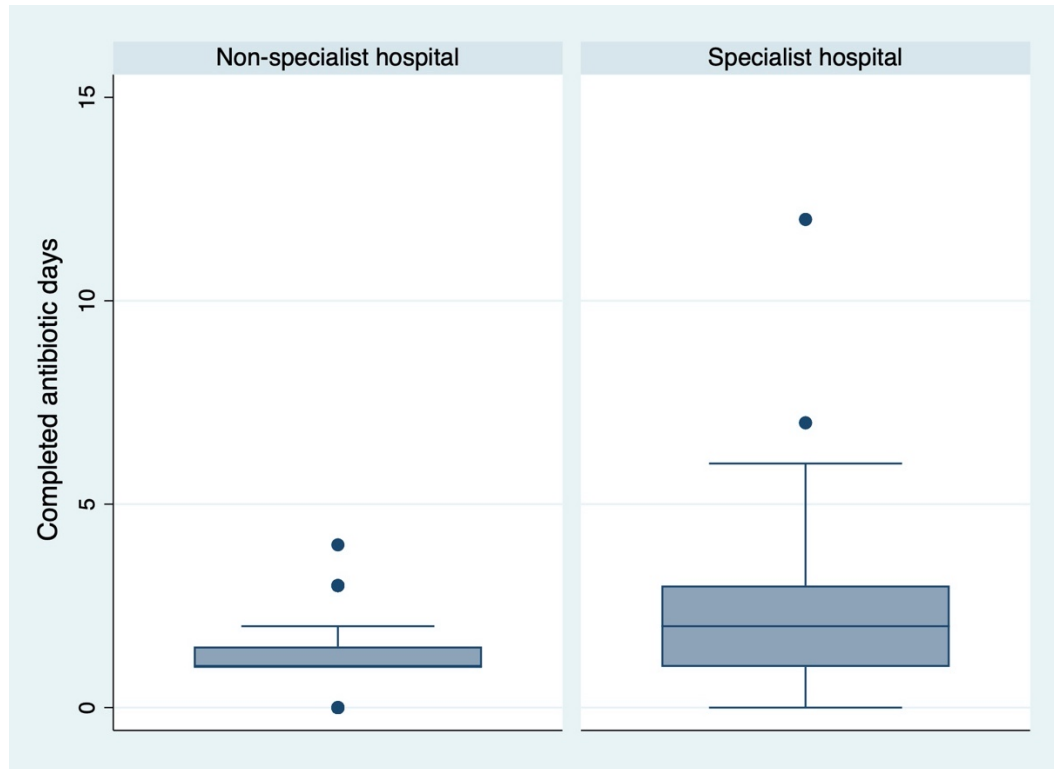

Supplementary Figure 2: Antibiotic duration by specialist and non-specialist hospital

Antibiotic duration in specialist hospitals: median 2 days (IQR 1-3 days), in non-specialist hospitals median 1 day (IQR 1-1.5 days),  $P < 0.0001$ . Dots represent outliers.

Supplementary Table 2: Dosing Frequency for Gentamicin and Benzylpenicillin

| Gentamicin       | Frequency | Percentage |
|------------------|-----------|------------|
| 24-hourly        | 100       | 55.9       |
| 36-hourly        | 43        | 24         |
| 48-hourly        | 26        | 14.5       |
| Single dose      | 10        | 5.6        |
| Total            | 179       | 100        |
|                  |           |            |
| Benzylpenicillin | Frequency | Percentage |
| 12-hourly        | 141       | 97.9       |
| 8-hourly         | 3         | 2.1        |
| Total            | 144       | 100        |
