# Supplementary material for: Antibiotic prescribing in neonatal sepsis: an Australian nationwide survey
Source: PubMed Central journal article supplement — BMJ Paediatr Open. 2020 Mar 17;4(1):e000643. doi: 10.1136/bmjpo-2020-000643 (PMC7101048; doi:10.1136/bmjpo-2020-000643), 2020-03-17
Supplement: bmjpo-2020-000643supp001.pdf [file bmjpo-2020-000643supp001.pdf]

## Appendix: Supplementary Material

## Appropriateness definitions

|               |                                  | If endorsed guidelines are <u>present</u>                                                                                                                                                                                                                                                                                                                                                                                                                                                                                                              | If endorsed guidelines are <u>absent</u>                                                                                                                                                                                                                                                                                                                          |
|---------------|----------------------------------|--------------------------------------------------------------------------------------------------------------------------------------------------------------------------------------------------------------------------------------------------------------------------------------------------------------------------------------------------------------------------------------------------------------------------------------------------------------------------------------------------------------------------------------------------------|-------------------------------------------------------------------------------------------------------------------------------------------------------------------------------------------------------------------------------------------------------------------------------------------------------------------------------------------------------------------|
| Appropriate   | 1<br><b>Optimal</b> <sup>1</sup> | Antimicrobial prescription follows either the Therapeutic Guidelines <sup>2</sup> or endorsed local guidelines <i>optimally</i> , including antimicrobial choice, dosage, route and duration <sup>3</sup>                                                                                                                                                                                                                                                                                                                                              | The antimicrobial prescription has been reviewed and endorsed by an infectious diseases clinician or a clinical microbiologist<br>OR<br>The prescribed antimicrobial will cover the likely causative or cultured pathogens <b>and</b> there is not a narrower spectrum or more appropriate antimicrobial choice, dosage, route or duration <sup>3</sup> available |
|               | 2<br><b>Adequate</b>             | Antimicrobial prescription does not optimally follow the Therapeutic Guidelines <sup>2</sup> or endorsed local guidelines, including antimicrobial choice, dosage, route or duration <sup>3</sup> , however, is a <b>reasonable</b> alternative choice for the likely causative or cultured pathogens<br>OR<br>For surgical prophylaxis, as above <b>and</b> duration <sup>3</sup> is less than 24 hours                                                                                                                                               | Antimicrobial prescription including antimicrobial choice, dosage, route and duration <sup>3</sup> is not the most optimal, however, is a <b>reasonable</b> alternative choice for the likely causative or cultured pathogens<br>OR<br>For surgical prophylaxis, as above <b>and</b> duration <sup>3</sup> is less than 24 hours                                  |
| Inappropriate | 3<br><b>Suboptimal</b>           | There may be a mild or non-life-threatening allergy mismatch<br>OR<br>Antimicrobial prescription including antimicrobial choice, dosage, route and duration <sup>3</sup> , is an <b>unreasonable</b> choice for the likely causative or cultured pathogens, including: <ul style="list-style-type: none"> <li>spectrum excessively broad, unnecessary overlap in spectrum of activity, dosage excessively high or duration excessively long</li> <li>failure to appropriately de-escalate with microbiological results</li> </ul>                      |                                                                                                                                                                                                                                                                                                                                                                   |
|               | 4<br><b>Inadequate</b>           | Antimicrobial prescription including antimicrobial choice, dosage, route or duration <sup>3</sup> is <b>unlikely</b> to treat the likely causative or cultured pathogens<br>OR<br>The documented or presumed indication does not require <b>any</b> antimicrobial treatment<br>OR<br>There may be a severe or possibly life-threatening allergy mismatch, or the potential risk of toxicity due to drug interaction<br>OR<br>For surgical prophylaxis, the duration <sup>3</sup> is greater than 24 hours (except where local guidelines endorse this) |                                                                                                                                                                                                                                                                                                                                                                   |
|               | 5<br><b>Not assessable</b>       | The indication is not documented and unable to be determined from the notes<br>OR<br>The notes are not comprehensive enough to assess appropriateness<br>OR<br>The patient is too complex, due to multiple co-morbidities, allergies or microbiology results, etc.                                                                                                                                                                                                                                                                                     |                                                                                                                                                                                                                                                                                                                                                                   |

<sup>1</sup> Taking into account acceptable changes due to the patient's weight or renal function, if this information is available

<sup>2</sup> Antibiotic Expert Group. Therapeutic Guidelines: Antibiotic. Version 15 (2014), or online version

<sup>3</sup> Duration should only be assessed if the guidelines state a recommended duration and the antimicrobial has already been dispensed for longer than this, or if there is a clear planned 'end date' documented

Supplementary Figure 1: Definitions of appropriate prescribing

Supplementary Table 1: Antibiotic Appropriateness and Compliance with Guidelines

| <b>Appropriateness*</b>                      | <b>Frequency**</b> | <b>Percentage</b> |
|----------------------------------------------|--------------------|-------------------|
| 1-Optimal                                    | 373                | 89.9              |
| 2-Adequate                                   | 27                 | 6.5               |
| 3-Suboptimal                                 | 11                 | 2.7               |
| 4-Inadequate                                 | 2                  | 0.5               |
| 5-Not Assessable                             | 2                  | 0.5               |
|                                              |                    |                   |
| <b>Compliance with Guidelines*</b>           | <b>Frequency**</b> | <b>Percentage</b> |
|                                              |                    |                   |
| Compliant with locally endorsed guidelines   | 330                | 79.5              |
| Compliant with <i>Therapeutic Guidelines</i> | 53                 | 12.8              |
| Non-compliant with guidelines                | 19                 | 4.6               |
| Directed therapy                             | 7                  | 1.7               |
| No guidelines available                      | 4                  | 1                 |
| Not assessable                               | 2                  | 0.5               |

\*These are as assessed by trained local auditors and categories are mutually exclusive

\*\*N=415 prescriptions

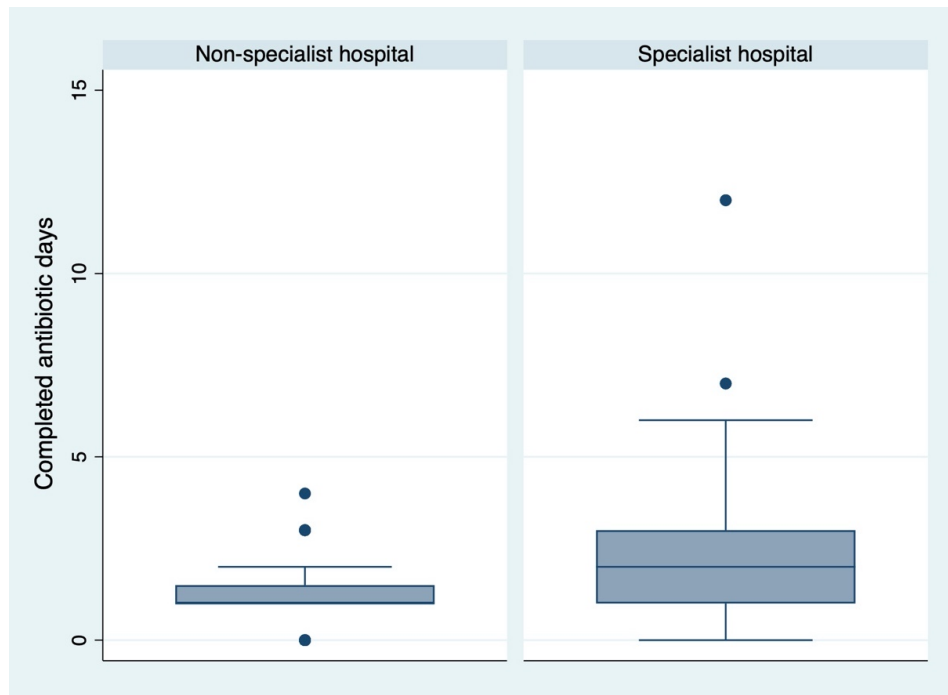

Supplementary Figure 2: Antibiotic duration by specialist and non-specialist hospital

Antibiotic duration in specialist hospitals: median 2 days (IQR 1-3 days), in non-specialist hospitals median 1 day (IQR 1-1.5 days),  $P < 0.0001$ . Dots represent outliers.

Supplementary Table 2: Dosing Frequency for Gentamicin and Benzylpenicillin

| Gentamicin       | Frequency | Percentage |
|------------------|-----------|------------|
| 24-hourly        | 100       | 55.9       |
| 36-hourly        | 43        | 24         |
| 48-hourly        | 26        | 14.5       |
| Single dose      | 10        | 5.6        |
| Total            | 179       | 100        |
|                  |           |            |
| Benzylpenicillin | Frequency | Percentage |
| 12-hourly        | 141       | 97.9       |
| 8-hourly         | 3         | 2.1        |
| Total            | 144       | 100        |
